RESEARCH ARTICLE

# Hafting of Middle Paleolithic tools in Latium (central Italy): New data from Fossellone and Sant'Agostino caves

Ilaria Degano<sup>1</sup>, Sylvain Soriano<sup>2</sup>, Paola Villa<sup>3,4,5\*</sup>, Luca Pollarolo<sup>5,6</sup>, Jeannette J. Lucejko<sup>1</sup>, Zenobia Jacobs<sup>7,8</sup>, Katerina Douka<sup>9,10</sup>, Silvana Vitagliano<sup>11</sup>, Carlo Tozzi<sup>12</sup>

**1** Department of Chemistry and Industrial Chemistry, Università di Pisa, Pisa, Italy, **2** ArScAn, ANTET, CNRS, Maison de l'Archéologie et de l'Ethnologie, Université Paris Nanterre, Nanterre Cedex, France, **3** University of Colorado Museum, Boulder, Colorado, United States of America, **4** Istituto Italiano di Paleontologia Umana, Rome, Italy, **5** School of Geography, Archaeology and Environmental Studies, University of the Witwatersrand, Johannesburg, South Africa, **6** Laboratoire Archéologie et Peuplement de l'Afrique, University of Geneva, Genève, Switzerland, **7** Centre for Archaeological Science, School of Earth, Atmospheric and Life Sciences, University of Wollongong, Wollongong, Australia, **8** Australian Research Council (ARC) Centre of Excellence for Australian Biodiversity and Heritage, University of Wollongong, Wollongong, Australia, **9** Department of Archaeology, Max Planck Institute for the Science of Human History, Jena, Germany, **10** Oxford Radiocarbon Accelerator Unit, Research Laboratory for Archaeology and the History of Art, University of Oxford, Oxford, United Kingdom, **11** Istituto Italiano di Paleontologia Umana, Museo Civico di Zoologia, Rome, Italy, **12** Dipartimento di Civiltà e Forme del Sapere, Università di Pisa, Pisa, Italy

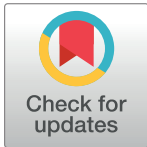

**OPEN ACCESS**

**Citation:** Degano I, Soriano S, Villa P, Pollarolo L, Lucejko JJ, Jacobs Z, et al. (2019) Hafting of Middle Paleolithic tools in Latium (central Italy): New data from Fossellone and Sant'Agostino caves. PLoS ONE 14(6): e0213473. <https://doi.org/10.1371/journal.pone.0213473>

**Editor:** Andrea Zerboni, Università degli Studi di Milano, ITALY

**Received:** December 8, 2018

**Accepted:** May 31, 2019

**Published:** June 20, 2019

**Copyright:** © 2019 Degano et al. This is an open access article distributed under the terms of the [Creative Commons Attribution License](https://creativecommons.org/licenses/by/4.0/), which permits unrestricted use, distribution, and reproduction in any medium, provided the original author and source are credited.

**Data Availability Statement:** All relevant data are within the manuscript and its Supporting Information files.

**Funding:** Funded by National Science Foundation US grant BCS 1118143 to Paola Villa (PI) and Sylvain Soriano (co-PI). NSF.gov. The funders had no role in study design, data collection and analysis, decision to publish, or preparation of the manuscript.

**Competing interests:** The authors have declared that no competing interests exist.

\* [villap@colorado.edu](mailto:villap@colorado.edu)

## Abstract

Hafting of stone tools was an important advance in the technology of the Paleolithic. Evidence of hafting in the Middle Paleolithic is growing and is not limited to points hafted on spears for thrusting or throwing. This article describes the identification of adhesive used for hafting on a variety of stone tools from two Middle Paleolithic caves in Latium, Fossellone Cave and Sant'Agostino Cave. Analysis of the organic residue by gas chromatography/mass spectrometry shows that a conifer resin adhesive was used, in one case mixed with beeswax. Contrary to previous suggestions that the small Middle Paleolithic tools of Latium could be used by hand and that hafting was not needed since it did not improve their functionality, our evidence shows that hafting was used by Neandertals in central Italy. Ethnographic evidence indicates that resin, which dries when exposed to air, is generally warmed by exposure to a small fire thus softened to be molded and pushed in position in the haft. The use of resin at both sites suggests regular fire use, as confirmed by moderate frequencies of burnt lithics in both assemblages. Lithic analysis shows that hafting was applied to a variety of artifacts, irrespective of type, size and technology. Prior to our study evidence of hafting in the Middle Paleolithic of Italy was limited to one case only.

## Introduction: The identification of hafting

The hafting of stone tools was an important advance in the technological evolution of Paleolithic humans. Joining a handle to a knife or scraper and attaching a sharp point to a wooden shaft made stone tools more efficient and easier to use [1, 2]. A comprehensive review of the various methods for the identification of hafting in prehistory can be found in [1]. For the purpose of this paper we present a brief review of categories of evidence.

The best and direct type of evidence for hafting is the finding of intact hafted tools. However, these are rare finds from sites with exceptional preservation, and all are dated to the Holocene or the end of the Pleistocene. One example is from Yukon, Canada. The melting ice patches in southwest Yukon have yielded many wooden arrows, bone and antler points [3]. One of these projectile weapons was an antler point slotted for microblade inserts held in place by an adhesive identified as spruce resin by gas chromatography/mass spectrometry (GC/MS) [4].

Similar examples of wooden arrows, antler and bone points with the flint elements still in place are dated to the Mesolithic [5] and two at least are dated to the late Upper Paleolithic [6,7]. GC/MS was used to identify the adhesive on weapons of Ötzi, the Alpine Iceman that died about 5200 BP at the border between Austria and Italy [1, 8].

Older artifacts have until now provided only indirect evidence of hafting. With the exception of bone tubes from Buran-Kaya III level C dated to the transition Middle to Upper Paleolithic in Crimea and most likely used as handles [9], the haft of Middle Paleolithic tools was likely made of wood and its usual decay in prehistoric sites means that only indirect lines of evidence are available to archaeologists. One of the earlier proposed lines of evidence was the presence of a peculiar patina pattern observed on a Mousterian side scraper with a whitish patina on most of the tool faces but with the original stone color on the proximal and a lateral edge [10]. Experimental work proved that a patina can result from exposure to atmosphere in a relatively short time while the hafted (hence protected) area retains the original dark stone color, thus indicating the location of the haft. A similar observation was done on a Still Bay point from Blombos which was axially hafted [11].

Other hafting traces depend on the way of arranging a tool in the haft. Thus microwear analysts look at microscopic scars, striations and polishes on the artifact edge where a distinctive pattern may be left by hafts and binding due to friction between the haft components [1, 12–16].

Another category of evidence comes from the identification of impact scars on spear tips and projectile points [11, 16,17,18] and references therein] and on laterally hafted microliths [19]. Morphological features such as tangs, bilateral notches, shoulders, base thinning, fluting on Clovis points, thin tips and flat profile of triangular flakes, or tip cross-sectional areas are features often used in combination with other lines of evidence to identify hafted points [20–22]. Clearly the presence of adhesive materials on the side or base of an artifact strengthens the reliability of inferences based on microwear, impact scars or morphological features.

## Resin and tar residues

If the adhesive, preserved on a tool as a black residue, is an organic material, its molecular composition can be identified by GC/MS. The advantage of GC/MS over microscopic examinations is that it is possible to conclusively identify the source of resinous material and identify compounds present in a mixture [23]. Microscopic examination, if not substantiated by chemical analysis cannot be considered conclusive for the identification of resinous material [24, 25]. GC/MS is currently considered the most robust method for the taxonomic characterization of organic adhesives [26]. This procedure has been successfully used in South African Middle Stone Age and Later Stone Age sites such as Sibudu, Diepkloof and Border Cave [27–31].

Middle Paleolithic examples of hafting technology, based on data provided by GC/MS, are several. The earliest evidence comes from Campitello Quarry in central Italy where a pitch made from birch bark was found on the proximal part of two flakes found in association with the bones of a young elephant (*Palaeoloxodon antiquus*) and several micromammals [32]. The micromammals date the site to a time shortly preceding the end of the Middle Pleistocene, a cool stadial episode before isotope stage 6. This implies most likely MIS 7.2, a cool but not very cold period within MIS 7, dated to 206–201 ka [32–34, 1; *contra* 26].

Two lumps of birch bark pitch, verified by combined GC/MS, come from the site of Königsau in Germany, which has an estimated age of 80,000. One of the pieces has a negative imprint of a wooden haft [35–36] (see also [37]). Heat-treated natural bitumen, identified by GC/MS, was used at the site of Umm-el-Tlel (Syria) for hafting purposes in layers dated 42,000 and 70,000 years ago [38, 39]. Evidence of bitumen on a Mousterian point and two Levallois flakes from the site of Hummal (Syria) was also found by GC/MS confirming a previous microscopic analysis, based on SEM-EDS, FTIR and Raman microscopy [40–41]. Bitumen was also identified by GC/MS as hafting residue on a retouched flake from a late Mousterian layer at a cave in Romania [42].

All the described different methods present some problems. We briefly discuss here the two most commonly used methods and the reliability of their results.

### Problems in the identification of hafting by microscopic analysis

The advantage of this method, when low-power and high-power microscopy are used, is that in assemblages with a low degree of postdepositional modification a large number of tools can be analyzed. Combining traces of hafting with evidence of use-wear traces on the working edges can provide plausible results. This is the case of Veerle Rots' analysis of stone tools from the Middle Paleolithic site of Biache [16]. Out of 105 tools that showed possible evidence of use, use-wear traces were identified with reasonable certainty for 65 tool edges; the prehensile mode was inferred. However the morphology of some residues is difficult to interpret [43]. Microscopic analysis is a subjective technique [44] since observations of wear traces vary between researchers. Blind tests have been used as an independent verification. Blind test applied to lithic microwear analyses have shown that the analyst's experience is an important factor but that a certain level of uncertainty and inaccuracies cannot be eliminated [44, 45]. The importance of considering the depositional context of examined tools to avoid misidentification due to incidental deposition of various residues on the tool edge is also stressed [43, 46, 47].

### Problems with the gas chromatography/mass spectrometry method

The main problem of this method, considered the most reliable method for the identification of organic adhesives [26] comes from the low level of preservation of organic residues. GC/MS analysis of one quartz flake in the Late Howiesons Poort layers of Diepkloof attested to the exploitation of resin from *Podocarpus elongatus* used for lateral hafting [30]. Twenty-eight other pieces have similar black residue in a lateral position, opposite to the sharpened edge. These were only macroscopically analyzed thus the hypothesis that those pieces were hafted can be considered as a proposition with limited certainty. Visual examination of 15,000 lithic artifacts from HP layers did not reveal any other evidence of artifacts with hafting adhesive [30].

Likewise, of six artifacts from MSA assemblages of Sibudu and Rose Cottage selected by a lithic specialist from hundreds of artifacts because they had ochre lines along a backed edge or had been described with residues, only two gave significant results [27]. More than 1000 artifacts come from layers of complex VI 3 at Umm el Tlel; of these 11 have black residue identified as bitumen by GC/MS. About 30 flakes also had traces of black residue but the limited amount was

insufficient for chemical analysis [39]. Thus while the chemical method is reliable and precise, the low level of organic residue preservation may restrict the interpretation of hafting to a small set of tools. In our study we used GC/MS which has greater analytical sensitivity than FTIR (Fourier Transform Infrared Spectroscopy [23] in quantitative measurements. The method is destructive but it requires only minute amount of residue (see “Sampling for GC/MS analysis”).

## Objectives

The objectives of our paper are: (a) to present the results of GC/MS analyses of organic residue on a number of stone artifacts from two Middle Paleolithic cave sites in central Italy, namely Grotta del Fossellone (layer 23 alpha) and Grotta di Sant’Agostino (layer A1), (Fig 1); (b) to describe the lithic industry, the context and dating of the two sites; this background information is needed to support the age and technology of the artifacts, hence it precedes the residue analysis; (c) to show that the organic residue is not the result of incidental deposition; (d) to examine previous suggestions that the small tools of Latium were used by hand and that hafting was not needed [48].

## Materials and methods

### Permits and repositories

The Fossellone collections are housed in the Pigorini National Museum of Prehistory and Ethnography in Rome. Permits to study, to take photos of the materials and to get faunal samples

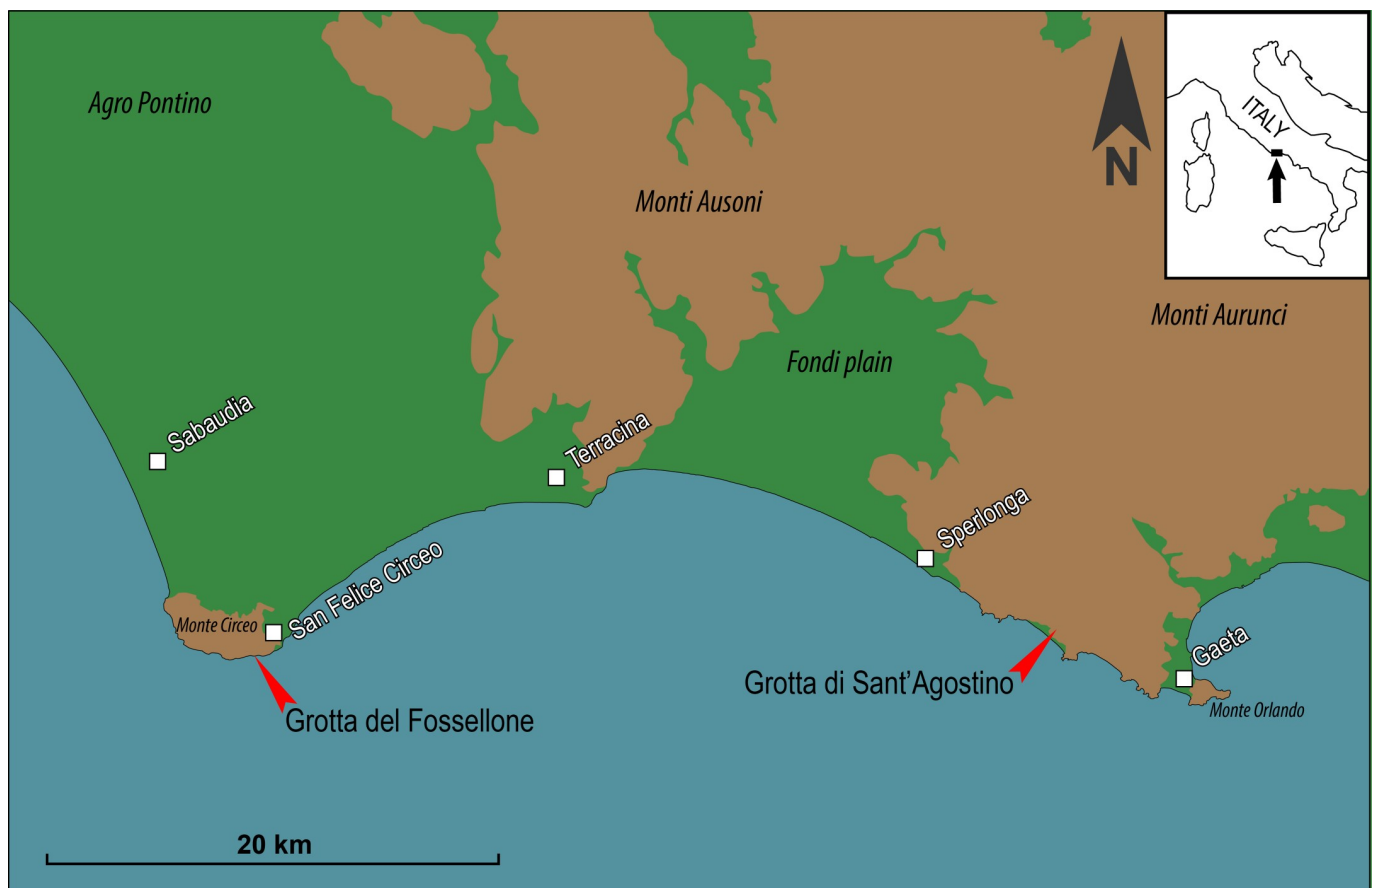

**Fig 1. Map of Grotta del Fossellone (41°13'26.29" N; 13°04'50.53" E) and Grotta di Sant’Agostino (41°14'01" N; 13°30'13.08" E).**

<https://doi.org/10.1371/journal.pone.0213473.g001>

for dating were obtained by the Soprintendenza of the Pigorini Museum (Prot. MBAC-S-MNPE Pigorini CL 25-02-03/1.5 and CL 25-02-04/5 and MBAC-S-MNPE Pigorini 0002338 24/06//2010 CL 25.02.03/1.5). Permit to clean the upper part of the Fossellone stratigraphic section with Middle Paleolithic and Aurignacian deposits and to take sediment samples for OSL dating was obtained by the Soprintendenza per i Beni Archeologici del Lazio (Prot. DG 6583, Class.34-31-02/414.1). Faunal materials for dating were kindly provided by Antonio Tagliacozzo of the Pigorini Museum.

The Sant'Agostino collections, except for a small number of pieces at the Museo Pigorini in Rome, are housed in the storage area of the Dipartimento di Civiltà e Forme del Sapere, University of Pisa, via Trieste 40, under the care of Prof. Carlo Tozzi, a co-author of this study. Hence a permit was not required.

### Specimen numbers

The Fossellone lithics from layer 23 alpha had the layer indicated but no catalogue number. We assigned individual number in sequential order to retouched pieces, flakes and cores individually bagged in reusable zipper bags (Minigrips) with preprinted labels.

All the Sant'Agostino pieces from layer A1 had catalogue numbers assigned by Carlo Tozzi for his study published in 1970.

### Chemical analysis

The analytical procedures and apparatus are in [S2 File](#).

### Grotta del Fossellone

**Context and stratigraphy.** Grotta del Fossellone opens onto the Mediterranean Sea at the foot of Monte Circeo. It owes its name (literally Great Ditch cave) to the wide circular opening that affects the limestone roof. It was excavated by the Institute of Human Paleontology in Rome under the supervision of A.C. Blanc [49], (Fig 2). When the cave was first explored in 1936, its only access was on a wide steep slope, covered with vegetation, descending to the sea. Subsequently, as the excavations progressed, an upper access was established along a gap between the infilling of the cave and the north wall. This gap ends in the deep part of the cavity called Grotta Elena. In its proximal part, the north wall is divided into small cavities and secondary tunnels, which were test excavated in 1937 and 1938. Systematic excavation did not really begin until after World War II, in 1947.

The Pleistocene infilling of the cave was originally up to the level of the roof opening. It can be divided into two phases. During the first phase, various layers accumulated over almost 6.5 m, including Tyrrhenian beach deposits at the base. The dipping of the layers towards the interior of the cave, the nature of the deposits and the absence of collapsed limestone blocks indicate that this first phase predates the opening of the roof. Level 22, described as a layer of sterile red clay, probably marks the intrusion of *terra rossa* from the slope above by open fractures in the roof. In the second infilling phase, from level 21 onwards, the roof of the cave opens gradually, seemingly without any major collapse. Clastic materials with a reddish clay matrix eroding from the slope entered the cavity through the growing hole in the roof and accumulated in the central part forming a large cone of clastic deposits leaning against the north wall.

The upper part of the main section (levels 1 to 11), cut through the upper two-thirds of the clastic deposits from the cone, was excavated in 1947. The excavation was continued in 1952 and 1953 from level 11 to level 51, representing 14 meters of deposits. The first 5 to 6 meters of infilling from the base are sterile or rather poor, while the last levels of the first phase (levels 27

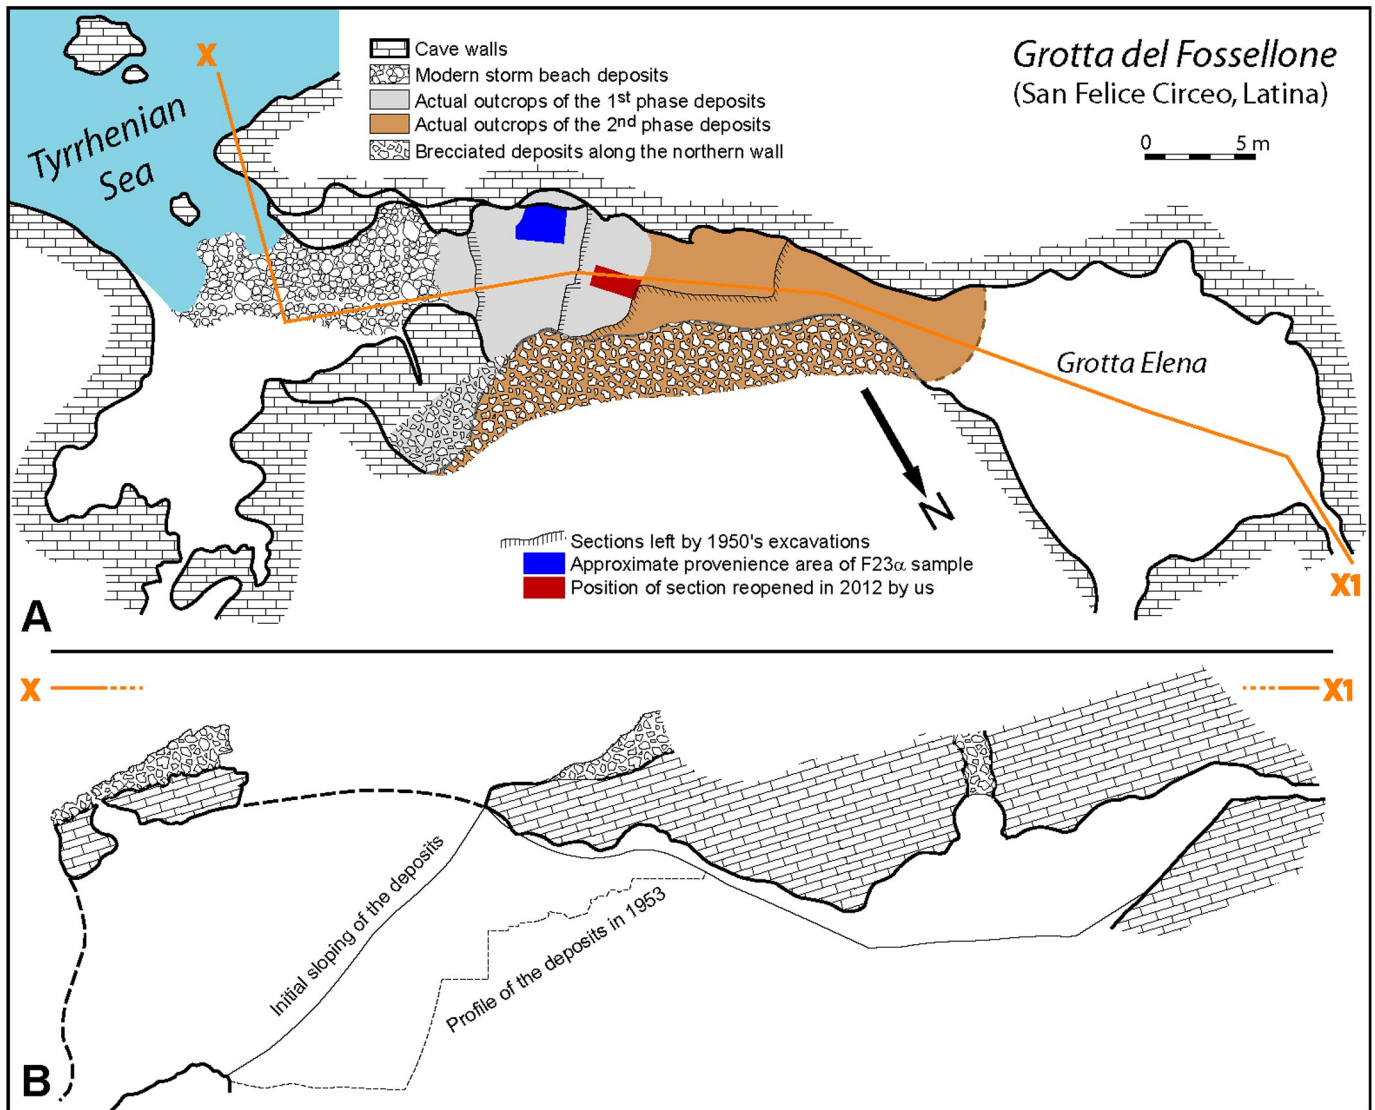

**Fig 2. Plan and section of Grotta del Fossellone.** (A) Plan of the cave with location of the 2012 fieldwork, intact remnants of Pleistocene deposits and approximate provenience of F23 $\alpha$  sample from the 1947–1953 excavation. Modified from [50]. (B) Schematic longitudinal section of the cave showing the large opening in the roof, modified from [49]. Courtesy of the Istituto Italiano di Paleontologia Umana.

<https://doi.org/10.1371/journal.pone.0213473.g002>

to 23) have provided abundant remains attributed to the regional Mousterian facies referred to as “Pontinian” and industries from layers 27 and 26 were described as “denticulate Pontinian” [49–52].

Level 21 is known for its rich Aurignacian occupation [49, 53]. Several human remains have been unearthed in a Mousterian level of a secondary cavity, the Antro Obermaier or in the rich Aurignacian level of the central slope [54, 55].

Our fieldwork at Grotta del Fossellone in October 2012 was to refresh a small section to be sampled in April 2013 for luminescence dating. A small square (0.8 x 2m) was opened at the foot of the remaining upper section of A.C. Blanc through layers 1–21 and two small scaled sections were prepared, the lower one ranging from the base of layer 26 to layer 22 while only layer 21 was exposed in the upper one (Fig A in S1 File). The proposed correlation between

1947–1953 stratigraphy by Blanc and Segre [49] and the stratigraphy described for the 2012 section is reported in Table 1.

**Dating.** Five samples were collected for optical dating from Fossellone Cave in 2013 (Fig 3 and Fig A in S1 file) and four ages were obtained from measurement of potassium-rich feldspar grains. Details about measurement of dose rates and equivalent doses are provided in the notes to Table 2. No age estimates could be obtained for FOS13-3 that was collected as a large intact sediment block and subsequently subsampled in the laboratory to separate samples from layers 22 (FOS13-3r) and 23 (FOS13-3g). All multigrain aliquots from these two sub-samples were saturated with respect to dose and further measurement of individual grains [29] resulted in a large spread of data suggestive of significant contamination by old and rotten bedrock material as well as bioturbation of sediment. It is, therefore, not possible to directly date layer 23 that contain the tools with adhesives, but must date to somewhere between ca.55 (Layer 26) and 40 (Layer 21) ka.

Seven teeth of *Bos* and *Equus hydruntinus* from layers 21, 23, 25, 26 and 27 excavated in the 1950's were analyzed by Rainer Grün for ESR and U-series dating but did not yield significant results due to problems with calibrating the X-ray source used for irradiation. Thus layer 23 which contains the stone tools with organic residue studied in this paper can be dated only to the time interval between layer 26 and layer 21.

Layer 21, which provides a terminus ante quem for layer 23, is earlier than expected, so we provide below evidence that supports the early date.

**The Aurignacian (layer 21).** Layer 21, defined in the literature as Aurignacian [49, 53], appears as a dark brown loam, sometimes interbedded with more clayey orange lenses, nearly 40 cm thick. During our fieldwork in 2012, this layer was worked frontally on less than 10 cm when partly refreshing the section left by A.C. Blanc. A few elements were collected (61 lithic pieces) and they confirm that it is the Aurignacian layer with in particular a broken end scraper, small bladelets and flakes from carinated end scrapers.

Some charcoal we have recovered in layer 21 was dated, as follows (Table 3):

The date is calibrated using the OxCal platform and the latest international calibration curve (IntCal 13; [64]). This determination was given an OxA-X code rather than OxA-as a

**Table 1. Proposal of correlation between the 1947–1953 stratigraphy from [49] and the stratigraphy described for the 2012 section.**

| Description of deposits by Blanc and Segre                                    | 1947–1953 units | 2012 stratigraphic units | Description of deposits                                                                                                                                           | Lithic assemblages |
|-------------------------------------------------------------------------------|-----------------|--------------------------|-------------------------------------------------------------------------------------------------------------------------------------------------------------------|--------------------|
| Reddish clay with limestone angular fragments                                 | F20 and upper   | US 10                    | Reddish clay with limestone angular fragments                                                                                                                     | Not excavated      |
| Brown incoherent loam [with limestone angular stones]                         | F21             | US 11                    | Brown to brown-black clayey silt with more clayey orange lenses                                                                                                   | Aurignacian        |
| Red clay                                                                      | F22             | US 12                    | Homogeneous orange clay with a mid-height brown lens                                                                                                              | Sterile            |
| Grey-green sand                                                               | F23             | US 13                    | Grey clay poor in siliceous granules filling gap between underlying limestone blocks                                                                              | Mousterian         |
| Dark gray clay with a stone pavement ("massicciata")                          | F24             | US 14                    | Dark grey brecciated layer. Heavily altered limestone blocks with internal ferruginous concretions and underlined by manganese concretions are resting at the top | Mousterian         |
| 10 cm level called "contact" between 24 and 26                                | F25             | US 15                    | Poorly sorted sand in a cemented grey to yellowish matrix                                                                                                         | Mousterian         |
| Sand with siliceous gravels                                                   | F26             | US 16                    | Dark brown clayey silt, rich in charcoal. Reddish-brown strip at the top                                                                                          | Mousterian         |
|                                                                               |                 | US 17                    | Brown-yellowish clayey sand rich in siliceous gravels                                                                                                             | Mousterian         |
| Conglomerate of small and medium size pebbles in a light gray cemented matrix | F27             | US 18                    | Light gray cemented sandy layer with patches of stalagmitic floor                                                                                                 | Not excavated      |

<https://doi.org/10.1371/journal.pone.0213473.t001>

warning due to a very low combustion yield (8%) which is linked with the sample being composed not of pure charcoal but of a mix of soil and charcoal. For this reason, the determination should be viewed as a minimum possible age. This age is statistically consistent with the optical ages for Layer 21 (Table 2). These ages overlap completely at 2-sigma confidence level (FOS13-1:  $40.3 \pm 3.1$  ka and FOS13-2:  $41.4 \pm 3.1$  ka).

For the past two decades, our knowledge of the chrono-cultural structure of the Aurignacian has been significantly enhanced and it is necessary to determine if this age agrees with the characteristics of the lithic and bone industry.

The complete study of this very rich assemblage exceeds the objectives of the present project so we focused on a sample in order to describe the bladelet production (Figs B-D in S1 File) as it was demonstrated that it discriminates between Aurignacian phases [65]. A very high frequency of carinated end scrapers was observed in this industry from layer 21 [66] in association with split-base points [49]. Aurignacian used thick flakes (around 3 cm thick) to shape carinated end scrapers [65, 67]. As it was almost impossible to produce such blanks by free-hand percussion from the small flint pebbles so distinctive of the Latium region, Aurignacian flintknappers from Fossellone used the bipolar technique to produce them. Thick ovoid pebbles were specifically selected for this task. The aim was to open a large platform through the extraction of a thick longitudinal flake by bipolar percussion [68]. The platform was needed to shape carinated end scrapers from which bladelets were produced. The production of small bladelets from carinated end scrapers in association with split-base bone points is distinctive of the Early Aurignacian in France [65, 69–71]. The chronological model for the Aurignacian in Western Europe is now strongly supported by a wealth of radiocarbon measurements [72–80] allowing Banks et al. [81, 82] to propose chronological boundaries between stratigraphically hierarchized cultural entities: the 40.0–39.2 ka interval for the transition from Protoaurignacian to Early Aurignacian and the 37.0–36.5 ka interval for the transition from Early Aurignacian to Evolved Aurignacian. The industry of layer 21 from Fossellone is now confidently labelled Early Aurignacian and the ages ( $^{14}\text{C}$ , luminescence) we obtained are in full agreement with the chronology described above. This type of Early Aurignacian is infrequent in Italy [83] but it was also identified at Riparo Mochi afterward [84]. Recent work confirms that at Mochi the Protoaurignacian (layer H) is followed by Early Aurignacian (layer G) [85, 86].

**The Middle Paleolithic industry from layer 23 alpha.** Layer 23 at Grotta del Fossellone is the latest Middle Paleolithic occupation in the stratigraphy of A.C. Blanc. It is followed by layer 22 which was described as sterile as confirmed by our own observations. The sample of the industry from layer 23 we selected was recovered in 1952 by A.C. Blanc in an irregular excavation grid area named  $\alpha$  (alpha), adjacent to the south wall of the cave (Fig 2), which extend over almost 4 square meters. This sample of layer 23 alpha has never been published whereas the lithics from area  $\gamma$  (gamma) and  $\beta$  (beta) have been studied [50]. Our technological and typological analyses of this sample (459) are based on methods used in previous studies [87–89]. We present here the main results.

Most of the raw material was collected in the form of small pebbles, generally less than 5 cm length (Fig E in S1 File). Fossil or active beaches were the sources of these raw materials [90] but they are now buried under Holocene colluvial deposits. Fine-grained flint is dominant (75.8%) but coarse flint or less silicified materials (chert, silicified limestone) were also selected. Blanks were produced through four types of chaîne opératoire (Figs F-G in S1 File). Several cores were reduced using the bipolar technique [68] and a third of the flakes were retouched. A good number of flakes with two opposed impact points and non-conchoidal fracture display use of the common bipolar on anvil technique, not the “Pontinian” variant so distinctive of the industry from Sant’Agostino (Fig H in S1 File). Levallois debitage is unambiguously identified.



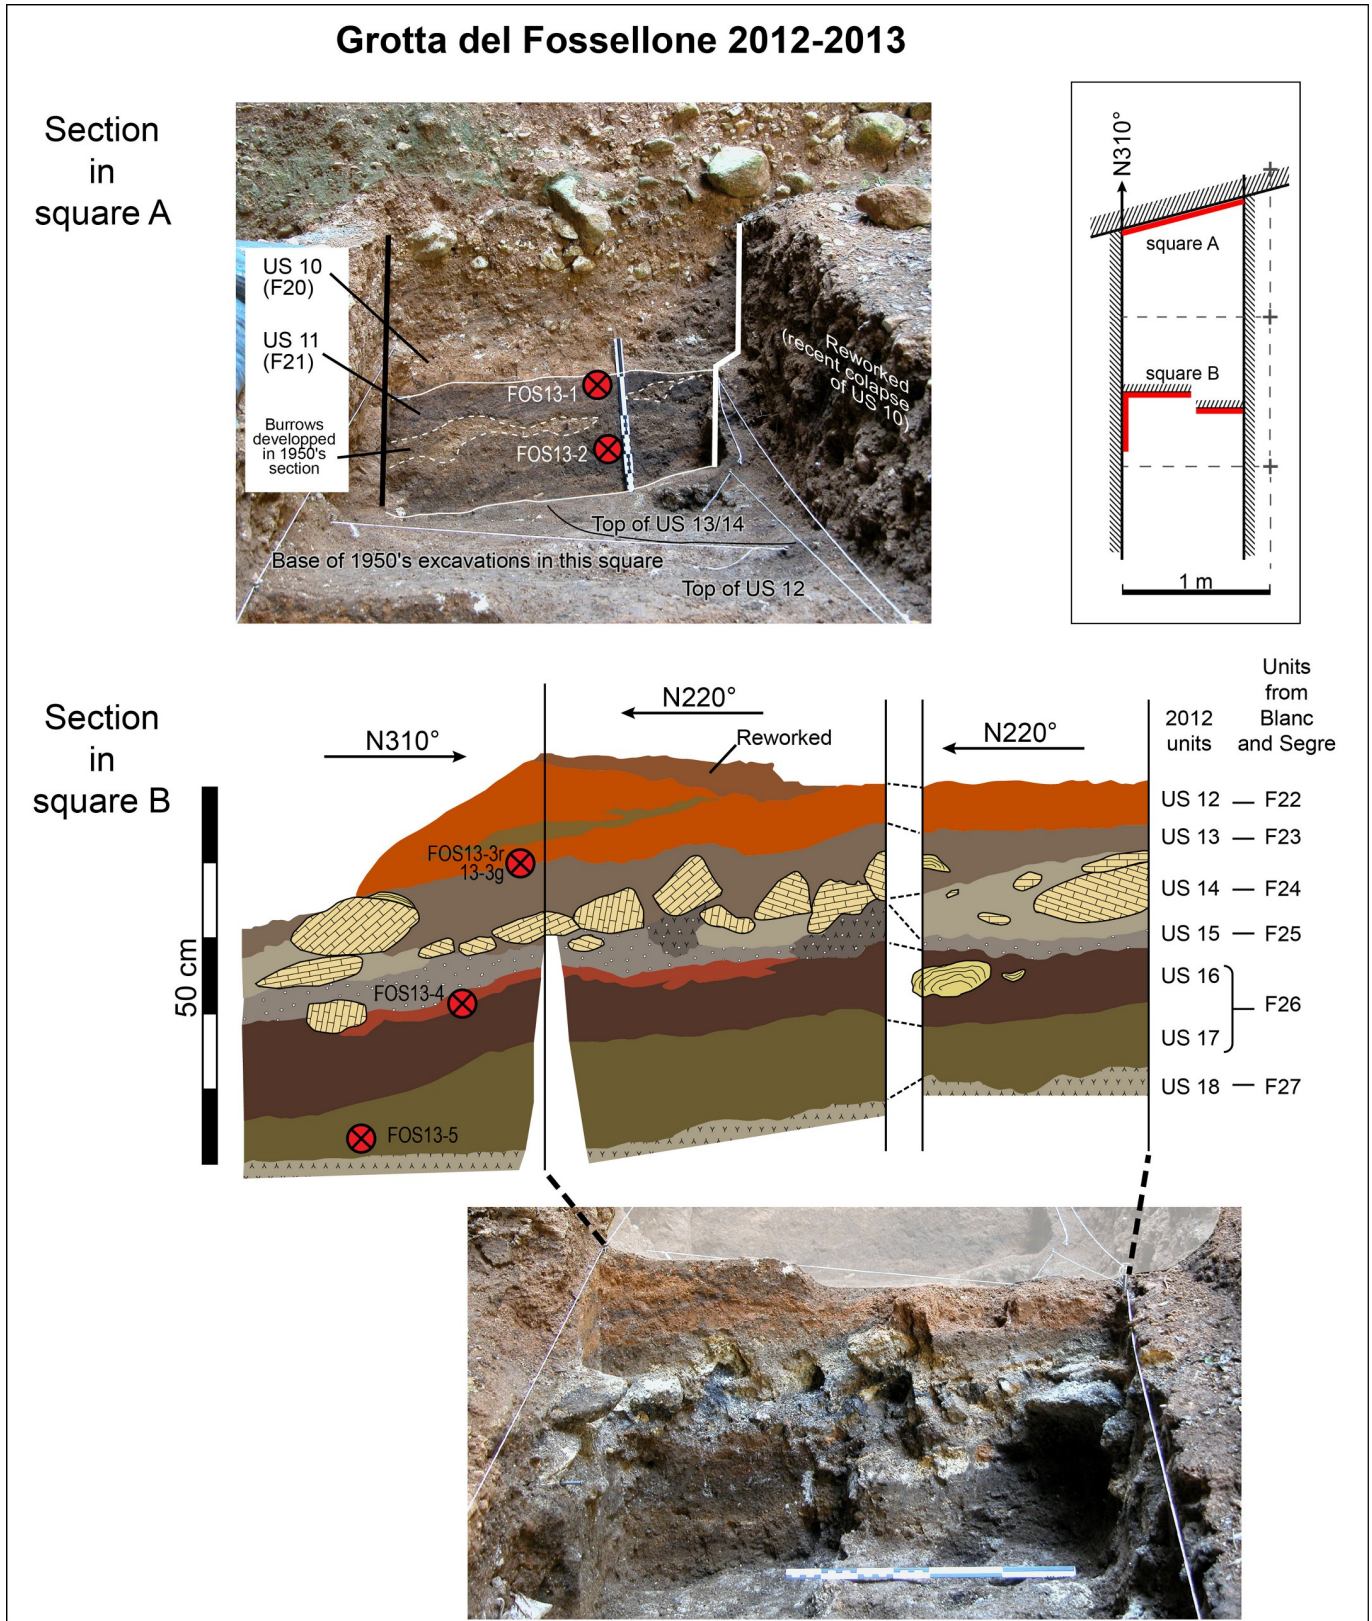

**Fig 3. Grotta del Fossellone.** Position of samples for luminescence dating in relation to the stratigraphic units defined in 2012.

<https://doi.org/10.1371/journal.pone.0213473.g003>

**Table 2. Dose rate data, D<sub>e</sub> values and luminescence ages for all samples in this study.**

| Sample code | Sample context |              | Field water content (%) | External dose rate (Gy/ka) |                   |                     | Internal dose rate (Gy/ka) <sup>d</sup> | Total dose rate (Gy/ka) <sup>e</sup> | D <sub>e</sub> (Gy) <sup>f</sup> | Age (ka) <sup>g</sup> |
|-------------|----------------|--------------|-------------------------|----------------------------|-------------------|---------------------|-----------------------------------------|--------------------------------------|----------------------------------|-----------------------|
|             | Layers (Blanc) | Layer (2012) |                         | Gamma <sup>a</sup>         | Beta <sup>b</sup> | Cosmic <sup>c</sup> |                                         |                                      |                                  |                       |
| FOS13-1     | 21             | US 11        | 31.7                    | 2.21 ± 0.09                | 2.23 ± 0.10       | 0.046               | 0.85 ± 0.07                             | 5.34 ± 0.17                          | 215 ± 14                         | 40.3 ± 3.1            |
| FOS13-2     | 21             | US 11        | 33.6                    | 2.10 ± 0.10                | 1.99 ± 0.09       | 0.046               | 0.85 ± 0.07                             | 4.99 ± 0.16                          | 206 ± 13                         | 41.4 ± 3.1            |
| FOS13-3r    | 22             | US 12        | 35.0                    | 1.80 ± 0.10                | 2.30 ± 0.12       | 0.046               | 0.85 ± 0.07                             | 4.99 ± 0.17                          | —                                | —                     |
| FOS13-3g    | 23             | US 13        |                         | 2.17 ± 0.12                | 0.046             | 0.85 ± 0.07         | 4.87 ± 0.17                             | —                                    | —                                |                       |
| FOS13-4     | 26             | US 16        | 34.0                    | 1.21 ± 0.06                | 1.45 ± 0.07       | 0.046               | 0.85 ± 0.07                             | 3.55 ± 0.14                          | 200 ± 6                          | 56.4 ± 2.6            |
| FOS13-5     | 26             | US 17        | 31.5                    | 1.07 ± 0.05                | 1.46 ± 0.07       | 0.046               | 0.85 ± 0.07                             | 3.43 ± 0.11                          | 186 ± 8                          | 54.2 ± 3.1            |

<sup>a</sup> The gamma dose rates for all samples were measured directly at the point of sampling with a 2” in diameter NaI(Tl) detector. The dose rates were estimated using the “threshold” technique [56], which gives an estimate of the combined gamma dose rate from U and Th chains and from <sup>40</sup>K. The detector was calibrated using the doped concrete blocks at Oxford [57].

<sup>b</sup> The external beta dose rates for all 6 samples were made on sub-samples of dried, homogenized and powdered samples by GM-25-5 beta counting [58]. Dry dose rates calculated were adjusted for the water content and allowance was made for the effect of grain size and HF acid etching on beta dose attenuation.

<sup>c</sup> The cosmic-ray dose rates were estimated from equations provided by [59], taking into account the burial depth of each sample (averaged over the entire period of burial), the density of sediment overburden (1.8 g/cm<sup>3</sup>), and the altitude (sea level) and longitude and latitude (41° 13’ 26.29” N; 13° 04’ 50.53” E) of Grotta del Fossellone. We assigned a relative uncertainty of ±15% to these dose rates to account for the systematic uncertainty in the primary cosmic-ray intensity [59].

<sup>d</sup> An internal beta dose rate was calculated by assuming internal <sup>40</sup>K and <sup>87</sup>Rb concentrations of 13 ± 1% and 400 ± 100 µg/g, respectively [60, 61]. These were converted to dose rates using the conversion factors of [62], and corrected for the absorbed dose fraction.

<sup>e</sup> Mean ± total uncertainty (68% confidence interval), calculated as the quadratic sum of the random and systematic uncertainties.

<sup>f</sup> Weighted mean ± 1σ uncertainty, calculated using the central age model. Individual D<sub>e</sub> values were estimated from the 250°C MET-pIRIR signal [63] of 10 multi-grain aliquots containing ~300 K-feldspar grains, for each sample. An average residual dose of 6.8 ± 0.5 Gy was not subtracted.

<sup>g</sup> The weighted mean of 8 measured fading rates was calculated (0.9 ± 0.3%), but ages were not corrected for fading

<https://doi.org/10.1371/journal.pone.0213473.t002>

It is poorly represented (Table 4) but three-quarter of the Levallois flakes have been retouched, the highest tool/debitage ratio. Flakes with scars of successive series of unidirectional parallel removals, which can come from the same platform, or an opposed or orthogonal one (together with cores characterized by a diversity of scars patterns) correspond to a simple scheme to produce regular blanks often present in Middle Paleolithic industries [87]. The amount of pseudo-Levallois and débordant flakes including typical pseudo-Levallois points is a direct evidence of discoid production [91, 92].

Scrapers dominate the tool-kit (79.4%). The remaining part comprises (in decreasing frequency) irregularly retouched flakes, denticulates, Mousterian points, end scrapers and retouched notches. Frequently (25/161 = 15.5% of retouched tools) older altered or patinated blanks (retouched tools, debitage) were collected and retouched again. Recycling is not uncommon in Middle Paleolithic industries [93–95], but it is especially developed in this assemblage. Scaled pieces are a minor component of the industry. Only two flakes coming from scaled pieces have been retouched.

The four pieces with verified residues from layer 23α are typologically and technologically variable (Fig 4). The most normalized flakes such as Levallois flakes or pseudo-Levallois points are not present in this set.

**Table 3. Radiocarbon dating on a charcoal sample from layer 21 by the oxford radiocarbon accelerator unit.** The calibrated ages are given as 95.4% probability intervals.

| AMS date, Laboratory no. | Date   | +/- | Calibrated BP 95.4% |
|--------------------------|--------|-----|---------------------|
| OxA-X-2507-43            | 33,950 | 750 | 40,762–36,946       |

<https://doi.org/10.1371/journal.pone.0213473.t003>

**Table 4. Fossellone layer 23 $\alpha$ . Counts of debitage and cores.** Broken flakes without a platform, flakes <1.5 cm and chunks are excluded. Flakes from tool making or tool reworking of any size are included.

| Flakes                                | N   | %     | Cores                | N  | %     |
|---------------------------------------|-----|-------|----------------------|----|-------|
| Levallois flakes                      | 4   | 2.1   | Levallois cores      | 4  | 8.2   |
| Pseudo-Levallois and débordant flakes | 25  | 13.0  | Discoidal cores      | 5  | 10.2  |
| Bipolar flakes                        | 33  | 17.2  | Bipolar cores        | 14 | 28.6  |
| Unidirectional flakes                 | 29  | 15.1  | Unidirectional cores | 10 | 20.4  |
| All other flakes                      | 101 | 52.6  | All other cores      | 16 | 32.7  |
| Total                                 | 192 | 100.0 | Total                | 49 | 100.0 |

<https://doi.org/10.1371/journal.pone.0213473.t004>

## Grotta di Sant'Agostino

This cave, 16 by 18 m and 50 m asl, was excavated in 1947 and 1948 by the Institute of Human Paleontology in Rome, the excavations were directed by E. Tongiorgi [96] (Fig 5). One shallow excavation trench, only 50 cm deep, was opened in the front part of the cave; it contained abundant fauna and only few artifacts. The main excavation trench in the internal part of the cave had a maximum thickness of 2.5 m and contained an abundant Mousterian lithic industry, defined as “Pontinian” (essentially a Mousterian on small pebbles) by A.C. Blanc in 1937 for assemblages in the Latium area.

The deposit in the main trench consisted of more or less concreted sand resting on a stalagmite. It was divided in five levels (A, A1-A4). The surface level (A) was disturbed due to modern use of the cave as a sheep pen and contained a mixture of Middle and Upper Paleolithic artifacts. Levels A1-A4 were excavated over an area of about 5.75 to 3 square meters, decreasing by depth. They could not be correlated to the deposit in the front of the cave; the level boundaries were not clearly distinct, but the levels were kept separate to divide the materials according to depth. A study of the large lithic and faunal assemblage was published by Carlo Tozzi in 1970 [96].

**Dating.** The deposit rests on a stalagmite, dated by U-series to  $112 \pm 14$  ka and  $120 \pm 15$  ka [97]. The ESR ages for levels 1 to 3 were done on tooth enamel. Tooth samples of known provenience were obtained from the Italian Institute of Human Paleontology in Rome. The external dose rate was obtained by using a portable gamma-ray spectrometer. Since the trenches had been filled up and sections were no longer visible, the measurements were made in holes cut into the deposit approximately at the level at which teeth had been obtained [97]. ESR ages for layer A1 was  $43 \pm 9$  ka, for A2 was  $53 \pm 7$  and for A3 was  $54 \pm 11$  ka. All these ages represent an average of multiple individual estimates [97].

Our 2011 visit to the cave confirmed that the location of trenches can no longer be determined without extensive re-excavation of the cave floor (Fig I in S1 File). Since suitable sediment samples cannot be obtained, OSL dating was ruled out. Radiocarbon dating of two animal bones from level A1 was attempted by the Oxford Laboratory but failed as the bones did not preserve collagen. A unique fragment of a *Mytilus* shell found by us in level A1 provided a final Upper Paleolithic date (OxA-27,399:  $11830 \pm 45$  BP (13760–13550 cal BP) and was clearly intrusive from level A above. In fact, our analysis of the A1 assemblage indicated that 18 stone artifacts were Upper Paleolithic, including some Epigravettian.

**The A1 lithic assemblage.** Of the four levels with Mousterian lithics, level A1 has yielded the larger number of artifacts (3138 including all flake fragments and chunks [96]). The industry shows substantial homogeneity without significant differences between levels. We decided to do a systematic technological and typological analysis of level A1 only and we present here the main results of our study.

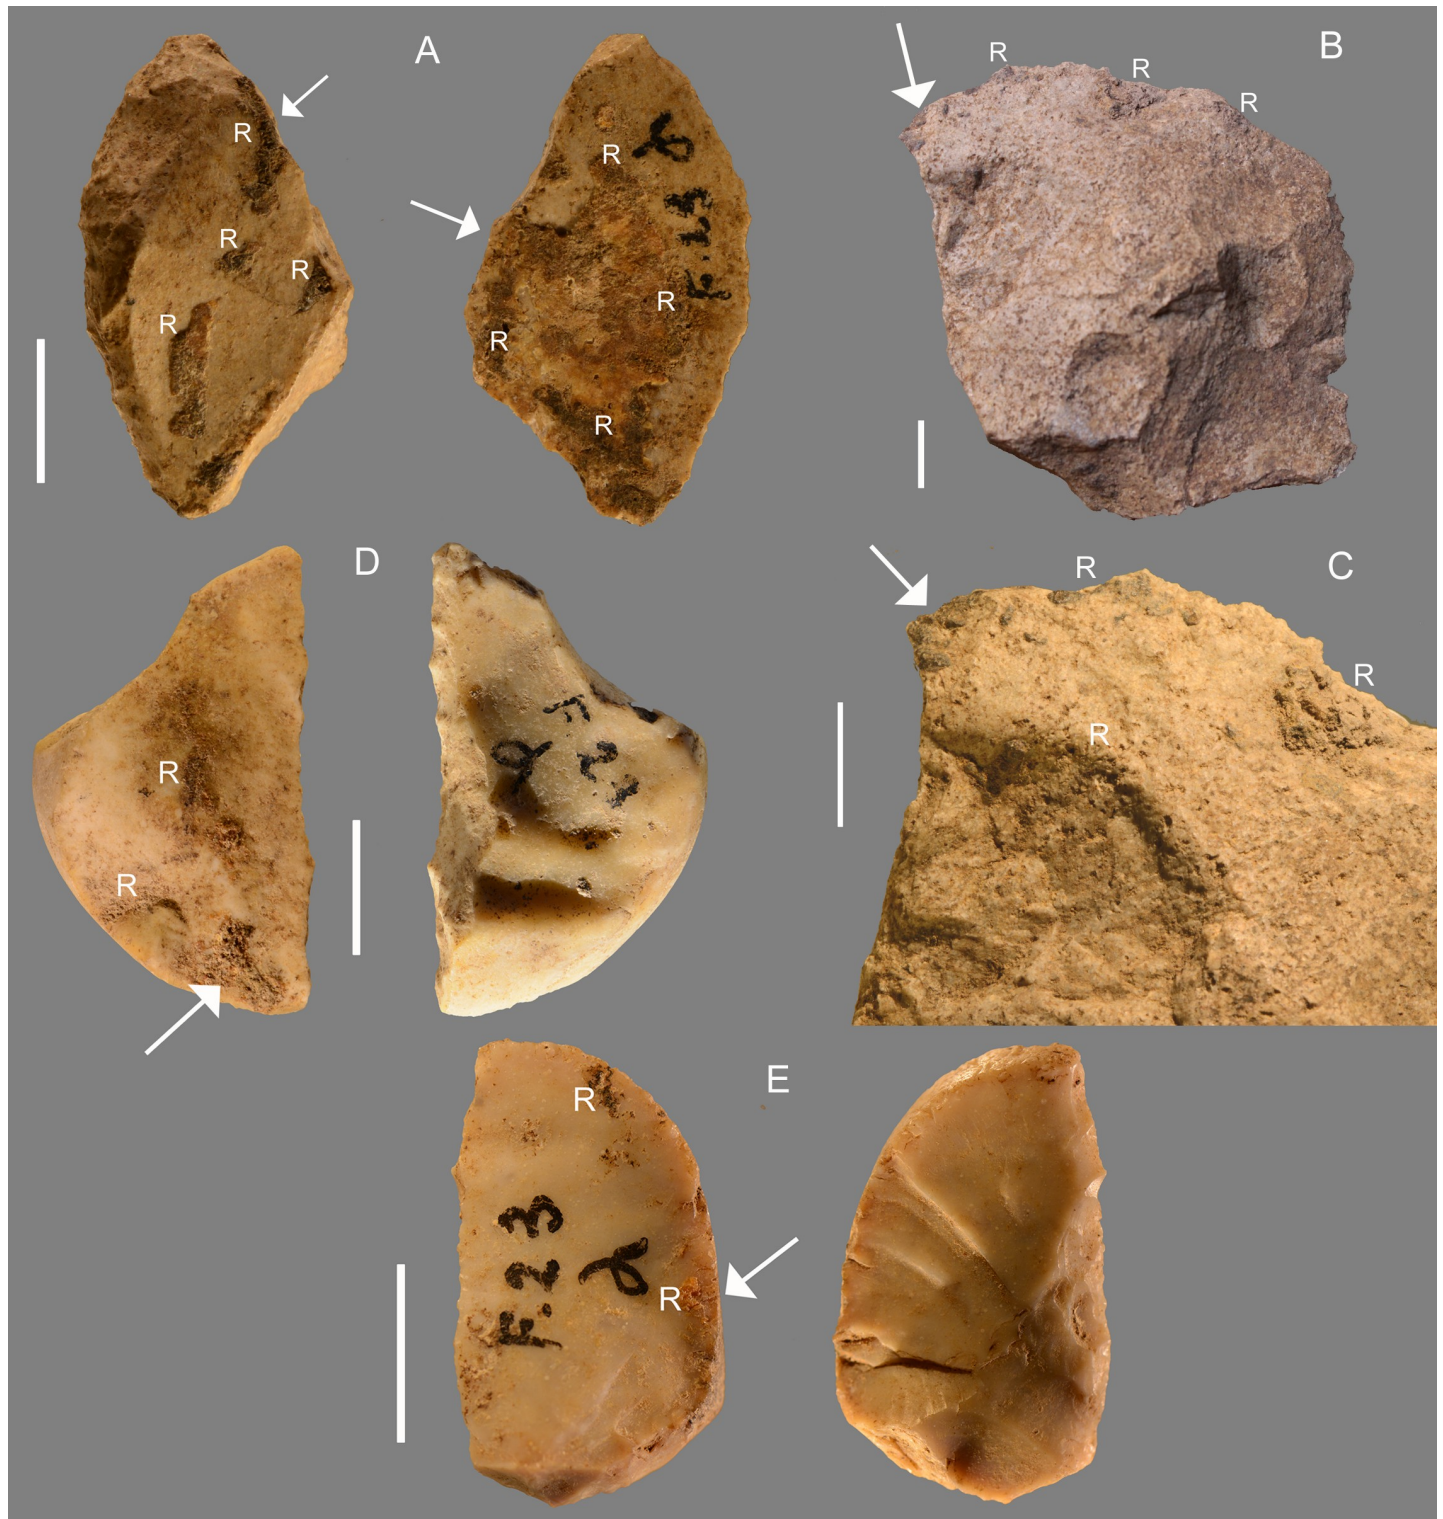

**Fig 4. Grotta del Fossellone, layer 23 alpha. Stone tools with analyzed residue.** The white arrow indicates the analyzed sample; R indicates macroscopically visible residue. All of flint except (B). (A) F1, side scraper. (B) F4, unretouched flake, silicified limestone, oriented according to the debitage axis; (C) detail of F4. (D) F5, transverse scraper, oriented according to the morphological axis; (E) F3, side scraper. Significant molecular markers of organic materials were found in all these pieces. Four other artifacts that gave no significant results are illustrated in Fig P in S2 File. Scale bar = 1 cm.

<https://doi.org/10.1371/journal.pone.0213473.g004>

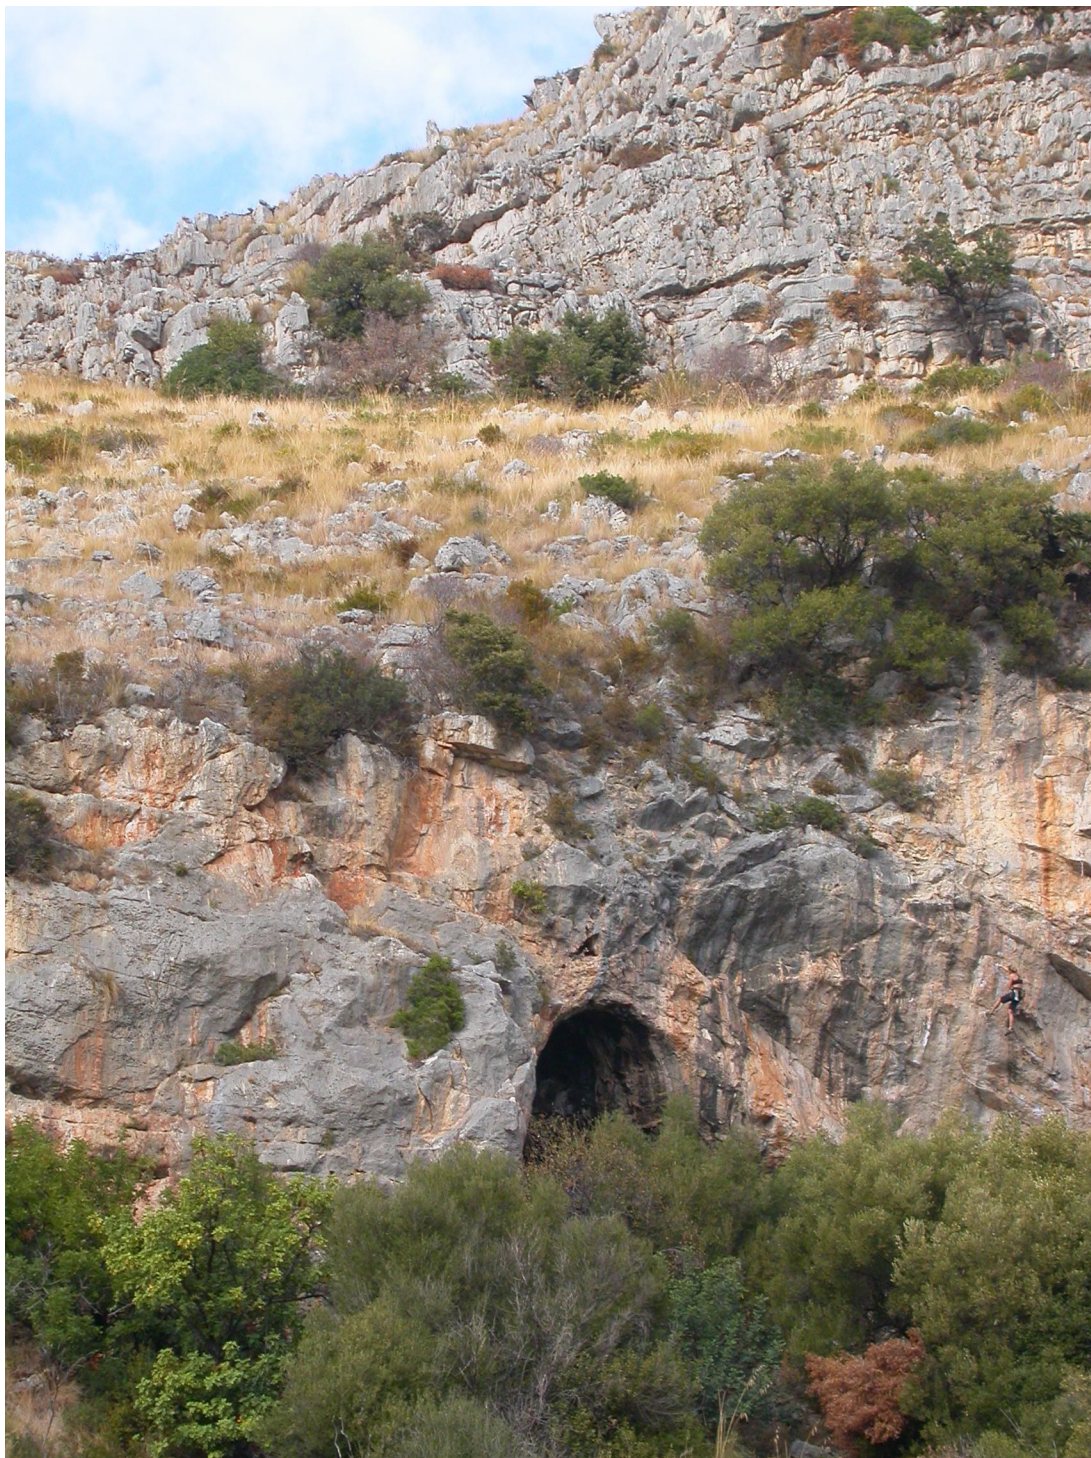

**Fig 5. View of Grotta di Sant'Agostino.**

<https://doi.org/10.1371/journal.pone.0213473.g005>

Level A1 was excavated on 5.75 square meters and was 30 cm thick. The total lithic assemblage of Sant'Agostino layer A1 is large (Table 5). The debitage is relatively abundant (about 5 flakes per core). The retouched tools ( $n = 763$ ) are dominated by side scrapers (66%). Flint

**Table 5. Sant’Agostino layer A1. Counts of debitage and cores.** Broken flakes without a platform, flakes <1.5 cm and chunks are excluded. Tool retouch flakes of any size are included.

| Flakes                                | N    | %     | Cores                                | N   | %     |
|---------------------------------------|------|-------|--------------------------------------|-----|-------|
| Flat flakes                           | 150  | 9.3   | Cores with flat removals             | 21  | 6.4   |
| Levallois flakes                      | 22   | 1.4   | Levallois cores                      | 22  | 6.7   |
| Bipolar flakes                        | 8    | 0.5   | Bipolar cores                        | 6   | 1.8   |
| All other flakes by direct percussion | 1428 | 88.8  | All other cores by direct percussion | 278 | 85.0  |
| Total                                 | 1608 | 100.0 | Total                                | 327 | 100.0 |

<https://doi.org/10.1371/journal.pone.0213473.t005>

pebbles, generally smaller than 5–6 cm, are the dominant raw material (1561/1608 = 97%). The pebbles are lenticular in cross-section and of very fine-grained flint. Their water-worn cortex and their regular shape indicate that the sources were beaches now buried by late Pleistocene and Holocene sands and alluvial deposits [90].

Three types of chaînes opératoires (i.e. reduction sequences) were used to produce blanks (Table 6). The most characteristic component is a particular variant of the bipolar technique [88]. The bipolar technique (or hammer and anvil technique) consists in resting a pebble (or a block or a flake) on anvil and striking it with a percussor (Fig H in S1 File). Flakes produced with this technique are characterized by a non-conchoidal fracture, a flat ventral face, a crushed or concave or no bulb of percussion, no measurable platform and an opposing bulb or shattering at the distal end.

However, the flakes of Sant’Agostino do not show features expected on bipolar flakes. Experiments show that the lack of opposing bulb or other traces at the distal end were probably either due either to the use of a soft anvil (e.g. wood or soft limestone) or more simply by resting the pebble on the ground and maintaining it in a vertical position [98]. This very specific variant of the bipolar technique (Figs H: B in S1 File) is particularly apt to the use of small pebbles, to initiate a flaking sequence or to obtain cortical and partly cortical flakes with an undamaged distal edge, a significant feature in very small products. This technique is typical of the above mentioned “Pontinian” assemblages [49–52, 88–90, 99]. We call these flakes “flat flakes” (Figs H: C in S1 File). Table 6 shows that 27% of retouched pieces were made on flat flakes and 6% on cores with flat scars.

The Levallois technology is very little represented and the classical bipolar modality even less (Tables 5 and 6). A third and much more common reduction sequence is documented by non-Levallois cores and flakes with series of unidirectional, bidirectional or multidirectional

**Table 6. Sant’Agostino layer A1. Blanks of retouched pieces.** Indeterminate flakes and indeterminate blanks are excluded.

| Categories                  | N   | %     |
|-----------------------------|-----|-------|
| Flakes by direct percussion | 363 | 61.4  |
| Flat flakes                 | 160 | 27.1  |
| Levallois flakes            | 8   | 1.4   |
| Bipolar flakes              | 4   | 0.7   |
| Cores by direct percussion  | 12  | 2.0   |
| Cores with flat removals    | 36  | 6.1   |
| Levallois cores             | 1   | 0.2   |
| Bipolar cores               | 1   | 0.2   |
| Pebbles                     | 6   | 1.0   |
| Total                       | 591 | 100.0 |

<https://doi.org/10.1371/journal.pone.0213473.t006>

removals by direct percussion, without any special preparation of the debitage surface or shaping of the core. Flakes so produced have unidirectional, orthogonal or convergent scars on the dorsal face and cortical or simply prepared platforms (Figs S10E in [S1 File](#)). All three reduction sequences are represented among the tools with hafting adhesive ([Fig 6](#)). Nos. 114 and 362 are on flat flakes, L2 is on a Levallois flake, no. 258 is a partly cortical ordinary flake, no. 211 is on an undetermined flake (missing the platform).

**Chemical analysis of Fossellone and Sant'Agostino Caves.** Sampling for GC/MS analysis. All artifacts from layer Fossellone layer 23 alpha and from Sant'Agostino layer A1 were examined for macroscopically visible residues. Seven artifacts at Fossellone were selected from a total of 360 retouched and debitage pieces, excluding cores, bipolar cores and scaled pieces. One piece was found among the sample of Fossellone layer 23 gamma at the Pigorini Museum. From the Sant'Agostino assemblage of layer A1 seven artifacts were selected with macroscopically visible residue; the total number of examined retouched pieces and flakes is 2140, excluding cores, pebbles, scaled pieces and undetermined blanks. Amorphous organic material was sampled by light scraping with stainless steel scalpels. The artifact description and weight of sample (in mg) for each of the Fossellone and Sant'Agostino selected pieces are provided in [Table 7](#). Several samples from Fossellone and one from Sant'Agostino weighed more than 0.1 mg, while two from Fossellone and six out of seven from Sant'Agostino weighed less than 0.1 mg. In spite of the reduced amount of sample, our procedure allows for detecting nanograms of organic material inside samples, and environmental and procedure blanks are run periodically, thus ensuring the representativeness of the results obtained on the microsamples.

The sampled material was subjected to a combined analytical procedure [100–101] for the identification of lipids, waxes, resinous, proteinaceous and saccharide materials in the same micro-sample. Further details on procedures and instrumentation are provided in [S2 File](#).

## Results

Neither the analysis of the proteinaceous nor of the polysaccharide fraction yielded results above the detection limits of the protocol, thus suggesting the absence of protein- or sugar-based materials in the samples.

The results of the analyses of the lipid-resinous fraction, which is performed after saponification of the relevant fraction of the original sample, and extraction of neutral components in hexane and acidic components in diethyl ether (after acidification) are presented below. Note that both fractions were admixed, dried, derivatized to obtain trimethylsilyl (TMS) derivatives and injected in the same analytical run to pre-concentrate the analytes of interest [100–101]. The identified organic compounds are summarized in [Table 8](#).

Chromatograms of environmental blanks are shown in Figs A-C of the [S2 File](#) for Fossellone and Sant'Agostino. Relevant chromatograms from Fossellone are in [Fig 7](#) and Figs D-F in [S2 File](#). For Sant'Agostino relevant chromatograms are in Figs 8 and 9 and in Figs G-K in [S2 File](#). The profiles of three artifacts from Fossellone (F2, F6, F10) that gave no significant results and one from Sant'Agostino (AGO 1) equally without results are in Figs L-O in [S2 file](#).

### Environmental blanks (Figs A-C in [S2 File](#))

To exclude contamination due to burial conditions, soil samples from a stratigraphic section were collected as environmental blanks and analyzed. This was the case for the Fossellone samples. No sections were available for Sant'Agostino; however, some bones still had some adhering sediment. Thus, we selected two bones from level A1 and we analyzed the adhering sediment as the reference environmental blank.

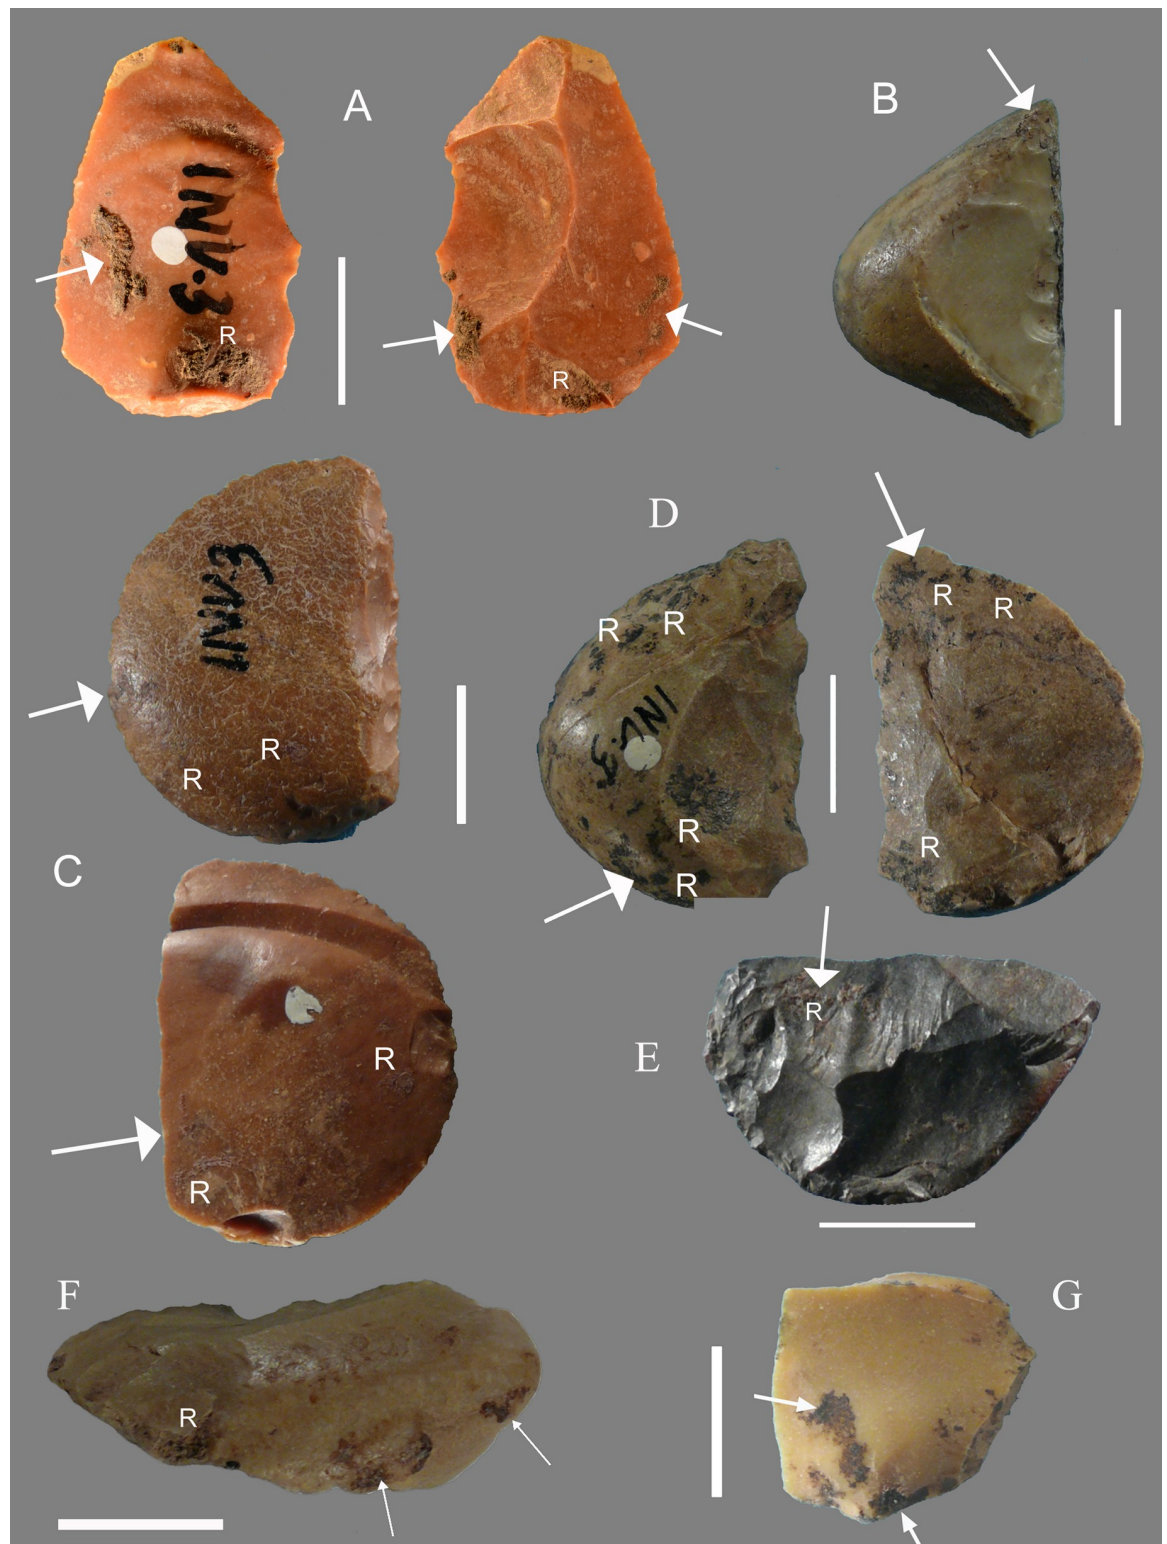

**Fig 6. Stone tools with analyzed residue from Sant'Agostino cave, layer A1, all tools are of flint.** The white arrow indicates the analyzed sample; R indicates macroscopically visible residue. (A) Levallois flake no. L2; (B) transverse scraper no. 362, oriented according to the morphological axis; (C) Side scraper no. 114; (D) Side scraper no. 258; (E) Scraper no. 211; (F) Transverse scraper no. 268; (G) Small unretouched flake, catalogue no. M1. All pieces gave significant results with the exception of (G). Scale bar = 1 cm.

<https://doi.org/10.1371/journal.pone.0213473.g006>



Table 7. Description of the artifacts and weight of the analyzed samples.

| Sample code | Sample weight [mg] | Description                                                                      | Photo                               |
|-------------|--------------------|----------------------------------------------------------------------------------|-------------------------------------|
| F1          | < 0.1              | Fossellone, layer 23 alpha. Flint side scraper                                   | <a href="#">Fig 4A</a>              |
| F2          | < 0.1              | Fossellone, layer 23 alpha. Unretouched flint flake                              | <a href="#">Fig P: A in S2 File</a> |
| F3          | 1.2                | Fossellone, layer 23 alpha. Flint side scraper                                   | <a href="#">Fig 4E</a>              |
| F4          | 5.0                | Fossellone, layer 23 alpha. Unretouched flake of silicified limestone            | <a href="#">Fig 4B and 4C</a>       |
| F5          | 4.9                | Fossellone layer 23 alpha. Flint transverse scraper                              | <a href="#">Fig 4D</a>              |
| F6          | 5.2                | Fossellone layer 23 alpha. Flint broken scraper                                  | <a href="#">Fig P: B in S2 File</a> |
| F7          | 1.5                | Fossellone, layer 23 alpha. Denticulate, flint                                   | <a href="#">Fig P: C in S2 File</a> |
| F8s         | 4.0                | Fossellone section, for sample OSL3, upper red band, sediment                    | <a href="#">Fig 3</a>               |
| F9s         | 4.0                | Fossellone section, for sample OSL3, lower gray band, sediment                   | <a href="#">Fig 3</a>               |
| F10         | 1.4                | Fossellone layer 23 gamma, Pigorini Museum no. 179081, side scraper              | <a href="#">Fig P: D in S2 File</a> |
| AGO 1       | < 0.1              | Sant'Agostino, level A1. Unretouched flint flake, M1                             | <a href="#">Fig 6G</a>              |
| AGO 2       | < 0.1              | Sant'Agostino, level A1. Flint side scraper no. 114                              | <a href="#">Fig 6C</a>              |
| AGO 3       | < 0.1              | Sant'Agostino, level A1. Flint scraper no. 211                                   | <a href="#">Fig 6E</a>              |
| AGO 4       | < 0.1              | Sant'Agostino, level A1. Flint side scraper no. 258                              | <a href="#">Fig 6D</a>              |
| AGO 5       | < 0.1              | Sant'Agostino, level A1. Flint transverse scraper no. 268                        | <a href="#">Fig 6F</a>              |
| AGO 6       | < 0.1              | Sant'Agostino, level A1. Flint transverse scraper no. 362                        | <a href="#">Fig 6B</a>              |
| AGO 10      | 0.9                | Sant'Agostino, level A1. Flint Levallois flake                                   | <a href="#">Fig 6A</a>              |
| B1          | 2.3                | Sant'Agostino, level A1. Medial fragment of radius-ulna of <i>Cervus elaphus</i> | Not illustrated                     |
| B2          | 1.5                | Sant'Agostino, level A1. <i>Bos Calcaneum</i>                                    | Not illustrated                     |

<https://doi.org/10.1371/journal.pone.0213473.t007>

By comparing the results obtained for the samples and the environmental blanks, we assessed the contribution of soil contamination. The intensity of the peak assigned to the internal standards IS2 (tridecanoic acid, internal standard for derivatization) was used, together with samples weight and the volume of the final injected solution to normalize the relative intensities of the other peaks in the chromatograms for proper comparison amongst the batches and to draw sound conclusions with respect to the presence of hafting material on the artifacts.

Fig A in [S2 File](#) shows the profile obtained for the sample of sediment belonging to Fossellone. For the sediment on bone samples of Sant'Agostino, the chromatograms are presented in Figs B-C in [S2 File](#). Phthalates (marked with \* in the chromatograms) are ubiquitous contaminants in the environment and were detected both in the blanks and in the samples; squalene is a contaminant due to manipulation of the artifacts and was detected both in the blanks and in the samples from Sant'Agostino.

### Chromatograms of Fossellone cave ([Fig 7](#) and [Figs D-F in S2 File](#))

Peak assignment are provided in [Table 8](#).

The main acidic components in all the Fossellone samples were long chain (10–20 carbon atoms) linear monocarboxylic acids. The acids were determined in significant amount, both above the detection limits of the analytical procedure and above the environmental blank level assessed in sediment samples, as can be seen by comparing the intensities of the chromatograms acquired for the residues and for the sediment, pointing to the presence of a lipid of plant origin (non-siccative). Branched fatty acids and cholesterol were both present in the sediment and in the samples in similar amounts and were thus not considered for further interpretation on hafting materials.

**Table 8. List of compounds identified in the lipid-resinous fraction of the analyzed samples (the columns relative to the analytical blanks are highlighted in gray). Acids and alcohols are identified as their TMS derivatives.**

| N  | compounds                                      | F1 | F2 | F3 | F4 | F5 | F6 | F7 | F8s | F9 | F10 | AGO1 | AGO2 | AGO3 | AGO4 | AGO5 | AGO6 | AGO10 | B1 | B2 |
|----|------------------------------------------------|----|----|----|----|----|----|----|-----|----|-----|------|------|------|------|------|------|-------|----|----|
| 1  | decanoic acid                                  | x  | x  |    | x  | x  | x  | x  | x   |    | x   |      |      |      |      |      |      |       |    |    |
| 2  | hexanedioic acid                               | x  | x  |    | x  | x  |    |    |     |    |     |      |      |      |      |      |      |       |    |    |
| 3  | 2-hydroxybenzoic acid                          | x  | x  |    | x  | x  |    |    |     |    |     |      |      |      |      |      |      |       |    |    |
| 4  | 4-methoxy-benzoic acid                         | x  | x  |    |    |    |    |    |     |    |     |      |      |      |      |      |      |       |    |    |
| 5  | undecanoic acid                                | x  | x  |    |    |    |    |    |     |    |     |      |      |      |      |      |      |       |    |    |
| 6  | dodecanol                                      |    | x  |    |    |    | x  |    | x   |    | x   |      |      |      |      |      |      |       |    |    |
| 7  | heptanedioic acid                              | x  | x  |    |    |    |    |    |     |    |     |      |      |      |      |      |      |       |    |    |
| 8  | 4-hydroxybenzoic acid                          | x  | x  | x  |    |    | x  | x  |     |    | x   |      |      |      |      |      |      |       |    |    |
| 9  | dodecanoic acid                                | x  | x  | x  | x  | x  | x  | x  | x   |    | x   | x    | x    | x    | x    | x    | x    | x     | x  | x  |
| 10 | tridecanol                                     |    | x  |    |    |    |    |    |     |    |     |      |      |      |      |      |      |       |    |    |
| 11 | tetradecanol                                   | x  | x  |    | x  | x  | x  |    |     |    | x   |      |      |      |      |      |      |       |    |    |
| 12 | 4-hydroxy-hydrocinnamic acid                   | x  | x  | x  | x  | x  | x  | x  | x   | x  | x   |      | x    | x    | x    | x    | x    | x     |    |    |
| 13 | nonanedioic acid (azelaic acid)                | x  | x  |    | x  | x  | x  |    | x   |    | x   |      | x    | x    | x    | x    | x    | x     | x  |    |
| 14 | tetradecanoic acid (myristic acid)             | x  | x  | x  | x  | x  | x  | x  |     | x  | x   | x    | x    | x    | x    | x    | x    | x     | x  | x  |
| 15 | pentadecanol                                   |    |    |    | x  | x  | x  |    |     |    | x   |      |      |      |      |      |      |       |    |    |
| 16 | decanedioic acid (sebacic acid)                | x  | x  | x  | x  | x  | x  |    |     |    | x   |      |      |      |      |      |      |       |    |    |
| 17 | pentadecanoic acid (• branched)                | x  | x  | x  | x  | x  | x  | x  |     |    | x   |      |      |      |      |      |      |       |    |    |
| 18 | hexadecanol                                    | x  | x  | x  | x  | x  | x  | x  |     |    | x   | x    | x    | x    | x    | x    | x    | x     | x  | x  |
| 19 | undecanedioic acid                             | x  | x  | x  |    | x  | x  |    |     |    | x   |      |      |      |      |      |      |       |    |    |
| 20 | 9-trans-hexadecenoic acid (palmitelaidic acid) | x  | x  | x  | x  | x  | x  |    | x   |    | x   | x    | x    | x    | x    | x    | x    | x     | x  | x  |
| 21 | hexadecanoic acid (palmitic acid, • branched)  | x  | x  | x  | x  | x  | x  | x  | x   |    | x   | x    | x    | x    | x    | x    | x    | x     | x  | x  |
| 22 | heptadecanol                                   |    |    |    |    | x  |    |    |     |    |     |      |      |      |      |      |      |       |    |    |
| 23 | heptadecanoic acid (• branched)                | x  | x  | x  | x  | x  | x  | x  |     |    | x   | x    | x    | x    | x    | x    | x    | x     | x  | x  |
| 24 | octadecanol                                    | x  | x  | x  | x  | x  | x  | x  | x   |    | x   | x    | x    | x    | x    | x    | x    | x     | x  | x  |
| 25 | docosane                                       | x  |    |    |    | x  |    | x  |     |    |     |      |      |      |      |      |      |       |    |    |
| 26 | 9,12-octadecadienoic acid (linoleic acid)      | x  | x  | x  | x  |    |    | x  |     |    |     |      |      |      |      |      |      | x     | x  | x  |
| 27 | octadec-9-enoic acid (oleic acid)              | x  | x  | x  | x  | x  | x  | x  |     |    | x   | x    | x    | x    | x    | x    | x    | x     | x  | x  |
| 28 | octadecanoic acid (stearic acid)               | x  | x  | x  | x  | x  | x  | x  | x   |    | x   | x    | x    | x    | x    | x    | x    | x     | x  | x  |
| 29 | tricosane                                      | x  |    |    |    | x  |    | x  |     |    |     |      |      |      |      |      |      |       |    |    |
| 30 | 14-hydroxyhexadecanoic acid                    | x  |    |    |    |    |    |    |     |    |     |      |      |      |      |      |      |       |    |    |
| 31 | 15-hydroxyhexadecanoic acid                    | x  |    |    |    |    |    |    |     |    |     |      |      |      |      |      |      |       |    |    |
| 32 | nonadecanoic acid                              | x  |    |    |    | x  |    |    |     |    |     |      |      |      |      |      |      |       |    |    |
| 33 | eicosanol                                      | x  | x  | x  | x  | x  | x  |    |     |    | x   |      |      |      |      |      |      |       |    |    |
| 34 | tetracosane                                    | x  |    |    |    | x  |    | x  |     |    |     |      |      |      |      |      |      |       |    |    |
| 35 | dehydroabietic acid (DHA)                      | x  |    | x  | x  | x  |    |    |     |    |     |      | x    | x    | x    | x    | x    | x     | x  | x  |
| 36 | eicosanoic acid                                | x  | x  | x  | x  | x  | x  |    | x   |    | x   |      | x    | x    | x    | x    | x    | x     |    |    |
| 37 | pentacosane                                    | x  |    |    |    |    | x  |    | x   |    |     |      |      |      |      |      |      |       |    |    |
| 38 | heneicosanol                                   | x  | x  |    |    |    |    |    |     |    |     |      |      |      |      |      |      |       |    |    |
| 39 | 9,10- dihydroxyoctadecanoic acid isomer        | x  |    |    |    |    |    |    |     |    |     |      |      |      |      |      |      |       |    |    |
| 40 | 9,10-dihydroxyoctadecanoic acid isomer         | x  |    |    |    |    |    |    |     |    |     |      |      |      |      |      |      |       |    |    |
| 41 | hexacosane                                     | x  | x  |    |    | x  |    | x  |     |    |     |      |      |      |      |      |      |       |    |    |
| 42 | 7-oxo-dehydroabietic acid (7-oxo-DHA)          | x  |    | x  | x  | x  |    |    |     |    |     |      | x    | x    | x    | x    | x    | x     |    |    |
| 43 | docosenoic acid (erucic acid)                  | x  | x  |    | x  |    | x  |    |     |    |     |      |      |      |      |      |      |       |    |    |
| 44 | docosanoic acid                                | x  | x  |    |    | x  |    |    |     |    |     |      |      | x    |      | x    |      | x     |    |    |

(Continued)

Table 8. (Continued)

| N  | compounds              | F1 | F2 | F3 | F4 | F5 | F6 | F7 | F8s | F9 | F10 | AGO1 | AGO2 | AGO3 | AGO4 | AGO5 | AGO6 | AGO10 | B1 | B2 |
|----|------------------------|----|----|----|----|----|----|----|-----|----|-----|------|------|------|------|------|------|-------|----|----|
| 45 | heptacosane            | x  |    |    |    |    |    | x  |     |    |     |      |      |      |      |      |      |       |    |    |
| 46 | tricosanoic acid       | x  |    |    |    |    |    |    |     |    |     |      |      |      |      |      |      |       |    |    |
| 47 | tetracosanol           | x  |    |    |    | x  |    |    |     |    |     |      |      |      |      |      |      |       |    |    |
| 48 | octacosane             | x  |    |    |    |    |    | x  |     |    |     |      |      |      |      |      |      |       |    |    |
| 49 | tetracosanoic acid     | x  | x  |    |    | x  |    |    |     |    |     |      | x    |      | x    |      | x    |       |    |    |
| 50 | nonacosane             | x  |    |    |    |    |    | x  |     |    |     |      |      |      |      |      |      |       |    |    |
| 51 | triacontane            | x  |    |    |    |    |    | x  |     |    |     |      |      |      |      |      |      |       |    |    |
| 52 | hexacosanoic acid      | x  |    |    |    |    |    |    |     |    |     |      |      |      |      |      |      |       |    |    |
| 53 | hentriacontane         | x  |    |    |    |    |    | x  |     |    |     |      |      |      |      |      |      |       |    |    |
| 54 | cholesterol            | x  | x  | x  |    |    |    |    | x   |    | x   | x    | x    | x    | x    | x    | x    | x     | x  | x  |
| 55 | dotriacontane          | x  |    |    |    |    |    | x  |     |    |     |      |      |      |      |      |      |       |    |    |
| 56 | β-sitosterol           | x  | x  |    |    |    |    |    |     |    |     |      |      |      |      |      |      |       |    |    |
| 57 | Squalene               |    |    |    |    |    |    |    |     |    |     | x    | x    | x    | x    | x    | x    | x     | x  | x  |
| 58 | methyl-dehydroabietate |    |    |    |    |    |    |    |     |    |     |      |      |      |      | x    |      | x     |    |    |

<https://doi.org/10.1371/journal.pone.0213473.t008>

Lignoceric acid (the linear monocarboxylic acid with 24 carbon atoms) was present in samples F1, F2, and F5 only (chromatograms in Fig 7 and Figs L and F in S2 File), and hexacosanoic acid (C26:0), also called cerotic acid, was identified in sample F1. The most abundant acids were palmitic (hexadecanoic acid, C16:0) and stearic acid (octadecanoic acid, C18:0). In all the samples, long chain alcohols (12–20 carbon atoms) were identified in different relative amounts. The presence of long-chain monocarboxylic fatty acids along with long chain alcohols and alkanes in significant amount with respect to the blank indicated the presence of plant material, including glycerolipids and waxes [102].

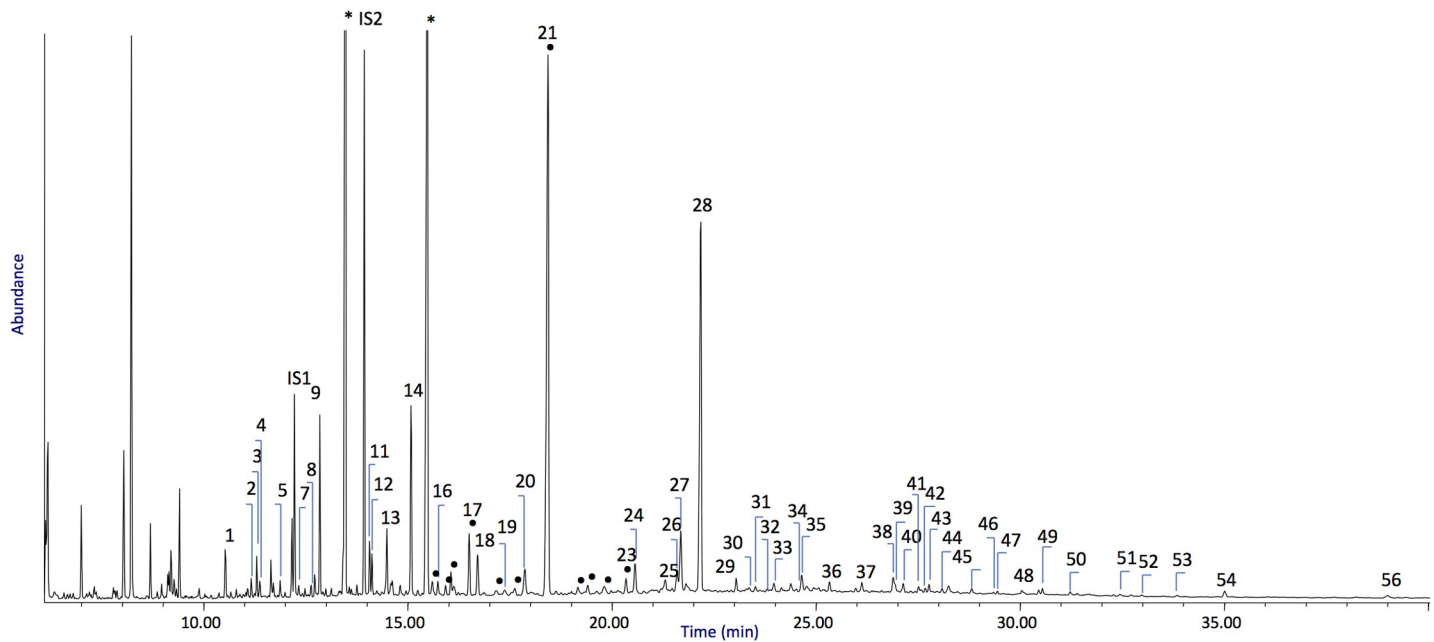

Fig 7. Chromatographic profile obtained for lipid-resinous fraction of sample F1. The numbers refer to Table 8. IS1 = hexadecane, IS2 = tridecanoic acid, •: branched fatty acids, \*: phthalate contamination.

<https://doi.org/10.1371/journal.pone.0213473.g007>

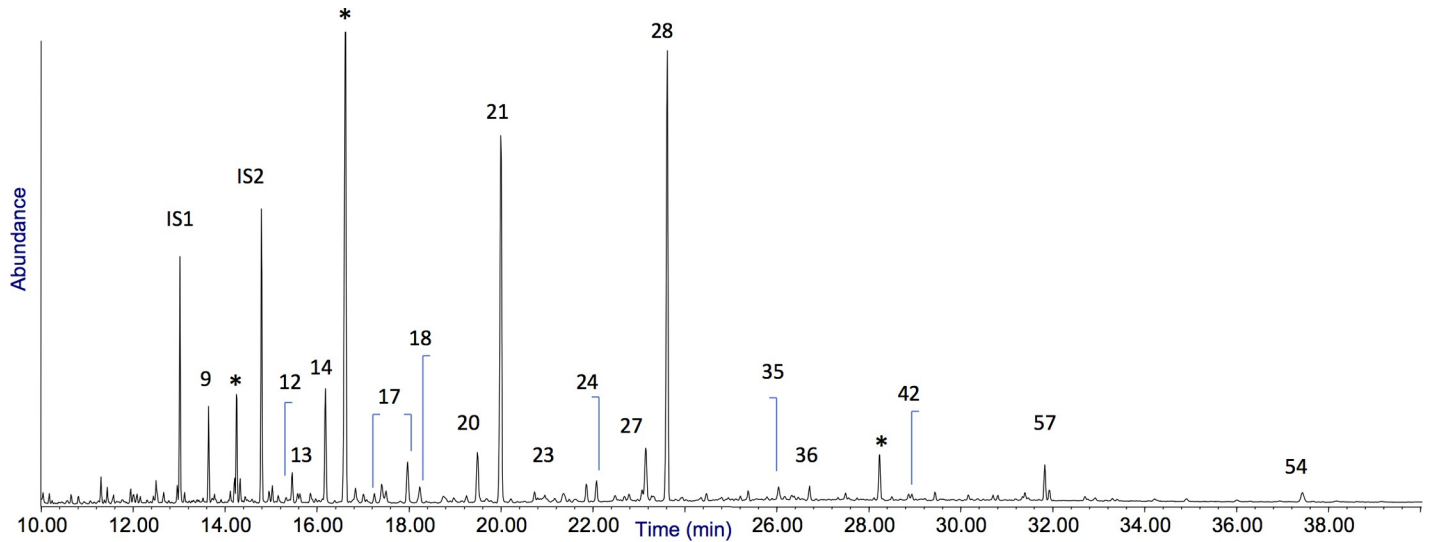

**Fig 8. Chromatographic profile obtained for lipid-resinous fraction of sample AGO4 no. 258.** The numbers refer to Table 8. IS1 = hexadecane, IS2 = tridecanoic acid, \*: phthalate contamination.

<https://doi.org/10.1371/journal.pone.0213473.g008>

Moreover, in sample F1 the presence of long chain fatty acids (C10-C26) together with long chain alcohols (C12-C24) and ( $\omega$ -1)-hydroxy and ( $\omega$ -2)-hydroxy-hexadecanoic acids (peaks #30 and #31 respectively) points to the presence of beeswax [103]. As expected, long chain fatty acids (C10-C26) together with long chain alcohols (C12-C24) are also present, whose profile is typical of a heated (by accident or on purpose) beeswax, admixed with a glycerolipid of plant origin [104,105].

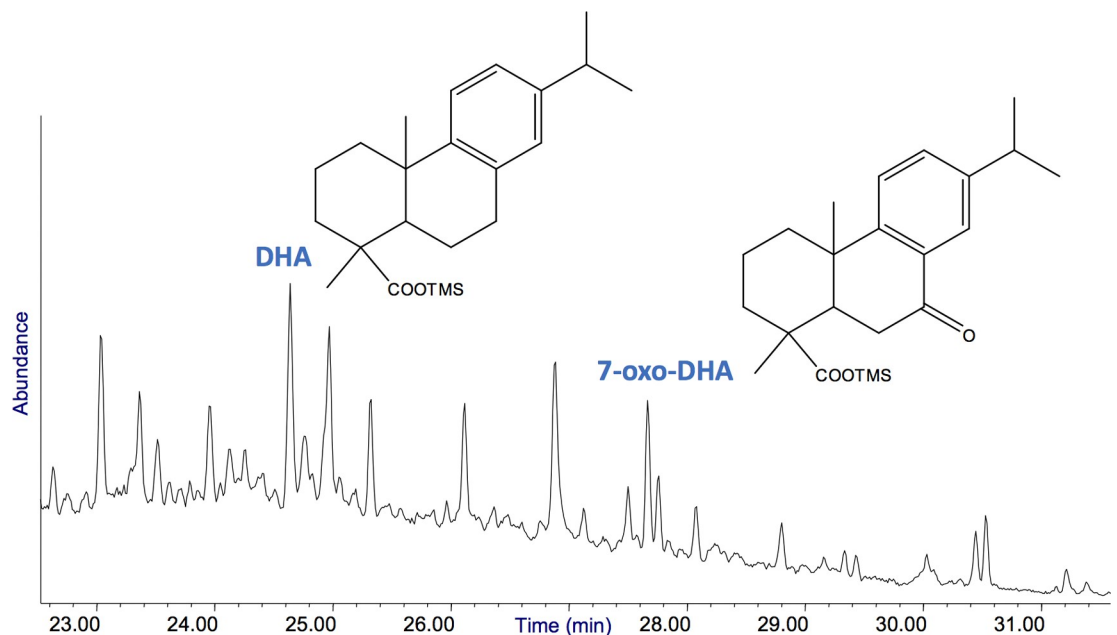

**Fig 9. Inset of the GC/MS profile of sample AGO 10 (the Levallois flake) highlighting the peaks due to methyl-dehydroabietate (Me-DHA), dehydroabietic acid (DHA) and 7-oxo-dehydroabietic acid (7-oxo-DHA).** The full chromatogram is presented in Fig K in S2 File.

<https://doi.org/10.1371/journal.pone.0213473.g009>

The terpenic fraction of samples F1, F3, F4 and F5 is relevant. The detection of diterpenes as dehydroabietic (#35) and 7-oxo-dehydroabietic (#42) highlights that the sample contained a material collected from a resin exuded from plants of the Pinaceae family [106]. Diterpenes more oxidized than 7-oxo-dehydroabietic were not detected in the samples.

In the case of sample F1, both beeswax and Pinaceae resin were identified, consistent to the recent observation that the addition of beeswax to a diterpenoid resin increases the adhesive properties of the mixture with respect to the single components [107]. Use of beeswax as a cement is documented ethnographically by a number of hatchet heads in Australian museums [12] and on points of the Final Paleolithic in Germany [108].

### Chromatograms of Sant'Agostino (Figs 8 and 9 and Figs G-K in S2 File)

All the profiles show the presence of a number of fatty acids (saturated and unsaturated). The saturated and unsaturated fatty acids were ascribed to a contamination from the soil, as proved by comparison with their intensities in the environmental blanks (chromatograms in Fig B-C in S2 File). Samples AGO2-6 and AGO10 contained diterpenes in relevant amount (dehydroabietic acid and 7-oxo-dehydroabietic, peaks #35 and #42, respectively, highlighted in the chromatograms and whose structure is presented in Fig 9), thus proving the presence of a resin exuded from plants of the Pinaceae in 6 out of seven samples. The detection of methyl-dehydroabietate (peak #58) in samples AGO5 and AGO10 might suggest that the resin was heated in the presence of wood, which produces methanol causing in turn the methylation of dehydroabietic acid [106, 109]. The absence of retene or other highly aromatized diterpenes rules out the possibility that the hafting material was pitch [110].

### Discussion

The analytical results, summarized in Table 9, show that the residues in Fossellone cave derive from plant lipids (oil and/or waxes) in some cases mixed with Pinaceae resin possibly to improve the adhesive properties of the resin. In one sample, beeswax mixed with the resin was detected. In Sant'Agostino cave samples, the material employed for hafting is Pinaceae resin, which was, at least in two cases (AGO 5, scraper no. 268 and AGO 10 Levallois flake) probably heated in the presence of wood before application. This should not be a surprise since resin is a thermoplastic material. Although resin is viscous (sticky) when it exudes from the tree, it dries exposed to the air. Since the sites are two caves where debitage, retouching and domestic activities were carried out it is likely that resin was collected at some distance from the cave. Then warming of the resin was needed. Ethnographic evidence indicates that resin was generally warmed and softened by moderate heat, such as holding the collected resin near a small fire or on its embers. Once softened the resin is pliable and can be molded and pushed in position in the haft and around the stone tool with a pointed stick [23]. The resin then sets again and hardens as it cools down, keeping the stone in place [12]. The hardened resin can be reheated and melted for re-hafting.

We call attention to the fact that even an accurate examination under the microscope does not allow the unambiguous detection of hafting residues, since the aspect of the residues on the pieces were all very similar in spite of the different composition. FTIR or other spectroscopic techniques might provide more insights on the nature of the residues, but would not allow a reliable comparison with the environmental blanks (sediments from section at Fossellone or adhering to bones at Sant'Agostino) due to their lower sensitivity especially towards minor components in a complex mixture. Only the thorough application of micro-destructive techniques, in parallel with the analysis of environmental blanks, allows for discriminating the

Table 9. Summary of results of the gas-chromatographic analyses.

| Samples              | Description                                                                     | Glycerolipids (including plant waxes) | Beeswax | Pinaceae resin |
|----------------------|---------------------------------------------------------------------------------|---------------------------------------|---------|----------------|
| F1                   | Fossellone layer 23 alpha, side scraper                                         | X                                     | X       | X              |
| F2                   | Fossellone layer 23 alpha, unretouched flake                                    | X                                     | -       | -              |
| F3                   | Fossellone layer 23 alpha, side scraper                                         | X                                     | -       | X              |
| F4                   | Fossellone layer 23 alpha, flake of silicified limestone                        | X                                     | -       | X              |
| F5                   | Fossellone layer 23 alpha, transverse scraper                                   | X                                     | -       | X              |
| F6                   | Fossellone layer 23 alpha, broken scraper                                       | X                                     | -       | -              |
| F7                   | Fossellone layer 23 alpha, denticulate                                          | -                                     | -       | -              |
| F10                  | Fossellone layer 23 gamma, Pigorini Museum no. 179081, side scraper             | X                                     | -       | -              |
| F8 sediment          | FOS13-OSL3, upper red band, sediment                                            | -                                     | -       | -              |
| F9 sediment          | FOS13-OSL3, lower gray band, sediment                                           | -                                     | -       | -              |
| AGO1                 | Sant'Agostino level A1, unretouched flake M1                                    | Blank level                           | -       | -              |
| AGO2                 | Sant'Agostino level A1, side scraper no.114                                     | Blank level                           | -       | X              |
| AGO3                 | Sant'Agostino level A1, scraper no. 211                                         | Blank level                           | -       | X              |
| AGO4                 | Sant'Agostino level A1, flint side scraper no. 258                              | Blank level                           | -       | X              |
| AGO5                 | Sant'Agostino level A1 flint transverse scraper no. 268                         | Blank level                           | -       | X              |
| AGO6                 | Sant'Agostino level A1, flint transverse scraper no. 362                        | Blank level                           | -       | X              |
| AGO10                | Sant'Agostino level A1, Flint Levallois flake no. L2                            | Blank level                           | -       | X              |
| B1 adhering sediment | Sant'Agostino, level A1, medial fragment of radio-ulna of <i>Cervus elaphus</i> | Blank level                           | -       | -              |
| B2 adhering sediment | Sant'Agostino, level A1, <i>Bos calcaneum</i>                                   | Blank level                           | -       | -              |

<https://doi.org/10.1371/journal.pone.0213473.t009>

residues on artifacts between actual hafting material and the site sediment and for the taxonomic identification of the resinous materials.

### Incidental deposition

On several pieces residue traces are present on the proximal and lateral (unretouched) edge. This is the case of Fossellone F1 (Fig 4A) F5 (Fig 4D) F3 (Fig 4E) and for Sant'Agostino the Levallois flake (Fig 6A), side scraper 114 (Fig 6C), and scraper 211 (Fig 6E). The latter has a residue strictly parallel to the working edge. Three pieces require a different interpretation. On one piece (Fig 6B, scraper 362 of Sant'Agostino) the organic residue is all along the scraping edge suggesting that the tool was used for collecting softened resin during dehafting. Alternatively, the scraper might possibly have been used for collecting resin from a trunk of a conifer tree but since the tool was abandoned after its last use in a habitation site, i.e. a cave away from trees, this hypothesis is less plausible. On F4 (Fig 4B) the residue is present mostly on the distal edge. This in an unretouched flake oriented according to the debitage axis. Three edges could have been used so the residue orientation does not inform us on the hafted area. There is a possible thermal scar on its right side. On Sant'Agostino side scraper 258 (Fig 6D) the residue traces are concentrated on proximal and distal edges but some stains are dispersed on the dorsal or the ventral face of the piece. This could be taken as evidence of syn- or post-depositional contamination thus excluding the hypothesis of hafting. However this is not the case for our pieces because (1) there is no evidence of resin in the surrounding sediment; (2) if the artifacts with Pinaceae residue were in or near a fire containing embers of Pinaceae wood, dripping resin could have transferred to the tool surface [111–112]. However, with the possible exception of flake F4, none of the other artifacts in this study have been heat treated: there are no changes in color, nor fractures or thermal scars due to heat.

There is instead clear evidence that incomplete preservation of the adhesive producing this pattern of dispersed stains occurred at several sites where the organic residue was identified.

At Umm el Tlel some Levallois flakes show large uniform stains but others have stains with a dispersed pattern ([39]: Figs 3, 4 and 5). On 30 flakes the amount preserved was insufficient for chemical analysis—which means that it occurred as small spots ([39]: p. 69 note 14). At Hummal small black stains of bitumen occur on a Mousterian point and on a Levallois flake ([40]: fig. 2: 1, 3).

## Conclusions

On most pieces the localization of the identified residue is consistent with lateral-proximal hafting. The ten pieces with identified resin (four from Fossellone and six from Sant'Agostino) are typologically and technologically variable. They include side and transverse scrapers, one Levallois flake and one unretouched flake. Most pieces have a length between 2.4–3.2 cm; the unretouched flake is 6 cm long but the indication of hafting is uncertain. Nevertheless it seems that hafting was applied to many pieces, regardless of their type, size and technological provenience. The use of resin as hafting material also suggests common fire use, as documented by evidence of burnt lithics at both sites: 12.6% at Sant'Agostino layer A1 (202 of 1608 retouched and debitage pieces) and 9.2% at Fossellone layer 23 alpha (43 of 467 retouched and debitage pieces). At Fossellone layer 23 charcoal and one fireplace are also documented [52]. However, as indicated above, none of the tools analyzed in this paper show thermal scars or other evidence of heating so the presence of resin cannot be considered as an accident due to exposure to burning resinous wood. Other forms of post-excavation contamination are excluded since the stone artifacts were put in plastic bag and were stored in drawers in the Pigorini Museum, the Archaeology Department in Pisa and the Italian Institute of Human Paleontology in Anagni.

Based on experimental butchering, it was suggested that the small Middle Paleolithic tools of Latium sites could be used by hand and that hafting did not improve their functionality [48]. Our evidence proves that hafting was used by Neandertals on the small tools of Latium during MIS 3. In Europe the spatial and geographic evidence of hafting and use of plant-based adhesives, strongly suggests that between MIS 7 and MIS 3 hafting was a stable component of Neandertal technological behavior.

## Supporting information

**S1 File. Sites and assemblages: Text and figures.**

(PDF)

**S2 File. GC/MS procedures, instrumentation and figures.**

(PDF)

## Acknowledgments

We thank the Soprintendenza Beni Archeologici del Lazio and Dr. Annalisa Zarattini for allowing us to clean and refresh the section of the Fossellone Cave to collect samples for OSL, <sup>14</sup>C and ESR dating. We are grateful to Mario Amore, Mario Mineo and the Director of the Pigorini National Museum of Prehistory and Ethnography in Rome, the Italian Institute of Human Paleontology and the Archaeology Laboratory of the University of Pisa for access to the collections and facilities during analysis. We thank Stefano Grimaldi, President of the Italian Institute of Human Paleontology, for granting us permission to use in modified form several drawings from the 1953 Blanc and Segre paper and from unpublished drawings in the A. C. Blanc project in the Institute collections. We thank Maria Bruno of the Italian Institute of Human Paleontology for showing us the Sant'Agostino Cave and for invaluable information

on the geology and stratigraphy of Fossellone Cave. Antonio Tagliacozzo of the Pigorini Museum in Rome provided us with *Bos* and *Equus hydruntinus* teeth from Fossellone layers 21, 23, 25, 26, 27 for ESR-U-series dating. We thank Rainer Grün for ESR and U-series analysis of the Fossellone teeth which unfortunately did not provide significant results. PV wishes to thank the University of Colorado Interlibrary Loan Service for their efficient and rapid deliveries and the University of Colorado Museum of Natural History for support. ID would like to thank Prof. Ribechini for the fruitful discussion of the results.

## Author Contributions

**Conceptualization:** Ilaria Degano, Sylvain Soriano, Paola Villa.

**Data curation:** Paola Villa, Luca Pollarolo, Carlo Tozzi.

**Formal analysis:** Ilaria Degano, Sylvain Soriano, Paola Villa, Luca Pollarolo, Zenobia Jacobs, Katerina Douka.

**Funding acquisition:** Sylvain Soriano, Paola Villa.

**Investigation:** Ilaria Degano, Sylvain Soriano, Paola Villa, Luca Pollarolo, Jeannette J. Lucejko, Zenobia Jacobs, Katerina Douka, Silvana Vitagliano, Carlo Tozzi.

**Methodology:** Ilaria Degano, Sylvain Soriano, Paola Villa.

**Project administration:** Paola Villa.

**Resources:** Ilaria Degano, Sylvain Soriano, Paola Villa, Zenobia Jacobs, Katerina Douka, Silvana Vitagliano, Carlo Tozzi.

**Supervision:** Paola Villa.

**Validation:** Ilaria Degano, Sylvain Soriano, Paola Villa, Luca Pollarolo, Jeannette J. Lucejko, Zenobia Jacobs, Katerina Douka, Silvana Vitagliano, Carlo Tozzi.

**Visualization:** Ilaria Degano, Sylvain Soriano, Paola Villa, Carlo Tozzi.

**Writing – original draft:** Ilaria Degano, Sylvain Soriano, Paola Villa, Luca Pollarolo, Jeannette J. Lucejko, Zenobia Jacobs, Katerina Douka.

## References

1. Barham L. From hand to handle: The first industrial revolution. Oxford University Press; 2013.
2. Keeley LH. Hafting and retooling: effects on the archaeological record. *Am Antiq.* 1982; 47: 798–809. <https://doi.org/10.2307/280285>
3. Helwig K, Monahan V, Poulin J, Andrews TD. Ancient projectile weapons from ice patches in north-western Canada: identification of resin and compound resin-ochre hafting adhesives. *J Archaeol Sci.* 2014; 41: 655–665. <https://doi.org/10.1016/j.jas.2013.09.010>
4. Helwig K, Monahan V, Poulin J. The identification of hafting adhesive on a slotted antler point from a Southwest Yukon ice patch. *Am Antiq.* 2008; 73: 279–288. <https://doi.org/10.2307/25470478>
5. Larsson L, Sjöström A. Early Mesolithic flint-tipped arrows from Sweden. *Antiquity, bulletin.* 2011; November 2011. <http://antiquity.ac.uk/projgall/larsson330/>
6. Nuzhnyi D. L'utilisation des microlithes géométriques et non géométriques comme armatures de projectiles. *Bulletin de la Société Préhistorique Française* 1989; 86: 88–96.
7. Pétilion JM, Bignon O, Bodu P, Cattelain P, Debout G, Langlais M, et al. Hard core and cutting edge: experimental manufacture and use of Magdalenian composite projectile tips. *J Archaeol Sci.* 2011; 38: 1266–1283. <https://doi.org/10.1016/j.jas.2011.01.002>
8. Sauter F, Jordis U, Graf A, Werther W, Varmuza K. Studies in organic archaeometry I: identification of the prehistoric adhesive used by the “Tyrolean Iceman” to fix his weapons. *ARKIVOC* 2000; 5: 735–747.



9. Laroulandie V, d'Errico F. Worked bones from Buran-Kaya III Level C and their taphonomic context. In: Chabai VP, Monigal K, Marks A editors. *The Middle Paleolithic and Early Upper Paleolithic of Eastern Crimea*. Liège: ERAUL 104; 2004: part I no. 7.
10. Friedman E, Goren-Inbar N, Rosenfeld A, Marder O, Burian F. Hafting During Mousterian Times—Further Indication, Mitekufat Haeven. *J Isr Prehist Soc*. 1994; 26: 8–31. <http://www.jstor.org/stable/23380042>
11. Villa P, Soressi M, Henshilwood CS, Mourre V. The Still Bay points of Blombos Cave (South Africa). *J Archaeol Sci*. 2009; 36: 441–460. <https://doi.org/10.1016/j.jas.2008.09.028>
12. Dickson FP. *Australian stone hatchets: a study in design and dynamics*. Academic Press Australia; 1981.
13. Lombard M. Evidence of hunting and hafting during the Middle Stone Age at Sibidu Cave, KwaZulu-Natal, South Africa: a multianalytical approach. *J Hum Evol*. 2005; 48: 279–300. <https://doi.org/10.1016/j.jhevol.2004.11.006> PMID: 15737394
14. Lombard M. The gripping nature of ochre: The association of ochre with Howiesons Poort adhesives and Later Stone Age mastics from South Africa. *J Hum Evol*. 2002; 53: 406–419. <https://doi.org/10.1016/j.jhevol.2007.05.004>
15. Rots V. Towards an understanding of hafting: the macro- and microscopic evidence. *Antiquity* 2003; 77: 805–815. <https://doi.org/10.1017/s0003598x00061743>
16. Rots V. Insights into early Middle Palaeolithic tool use and hafting in Western Europe. The functional analysis of level IIa of the early Middle Palaeolithic site of Biache-Saint-Vaast (France). *J Archaeol Sci*. 2013; 40: 497–506. <https://doi.org/10.1016/j.jas.2012.06.042>
17. Villa P, Boscato P, Ranaldo F, Ronchitelli A. Stone tools for the hunt: points with impact scars from a Middle Paleolithic site in southern Italy. *J Archaeol Sci*. 2009; 36: 850–859. <https://doi.org/10.1016/j.jas.2008.11.012>
18. Villa P, Lenoir M. Hunting and Hunting Weapons of the Lower and Middle Paleolithic of Europe. In: Hublin JJ, Richards MP editors. *The Evolution of Hominin Diets: Integrating Approaches to the Study of Palaeolithic Subsistence*. Springer Science + Business Media B.V.; 2009. pp. 59–85. [https://doi.org/10.1007/978-1-4020-9699-0\\_5](https://doi.org/10.1007/978-1-4020-9699-0_5)
19. Yaroshevich A, Nadel D, Tsatskin A. Composite projectiles and hafting technologies at Ohalo II (23 ka, Israel): analyses of impact fractures, morphometric characteristics and adhesive remains on microlithic tools. *J Archaeol Sci*. 2013; 40: 4009–4023. <https://doi.org/10.1016/j.jas.2013.05.017>
20. Rots V. Are Tangs Morphological Adaptations in View of Hafting? Macro- and microscopic wear analysis on a selection of tanged burins from Maisières-Canal. *Notae Praehistoricae*. 2002; 61–69.
21. Tankersley KB. Clovis Mastic and its Hafting Implications. *J Archaeol Sci*. 1994; 21: 117–124. <https://doi.org/10.1006/jasc.1994.1012>
22. Villa P, Soriano S. Hunting weapons of Neanderthals and Early Modern Humans in South Africa: Similarities and Differences. *J Anthropol Res*. 2010; 66: 5–38. <http://www.jstor.org/stable/27820844>
23. Matheson CD, McCollum AJ. Characterising native plant resins from Australian Aboriginal artefacts using ATR-FTIR and GC/MS. *J Archaeol Sci*. 2014; 52: 116–128.
24. Burger P, Charrié-Duhaut A, Connan J, Albrecht P. Taxonomic characterisation of fresh Dipterocarpaceae resins by gas chromatography–mass spectrometry (GC–MS): Providing clues for identification of unknown archaeological resins. *Archaeol Anthropol Sci*. 2011; 3: 185–200.
25. Langejans GHJ. Middle Stone Age pièces esquillées from Sibidu Cave, South Africa: An initial micro-residue study. *J Archaeol Sci*. 2010; 37: 971–985.
26. Cnats D, Tomasso S, Rots V. The Role of Fire in the Life of an Adhesive. *J Archaeol Method Theory* 2018; 25: 839–862. <https://doi.org/10.1007/s10816-017-9361-z>
27. Villa P, Pollarolo L, Degano I, Birolo L, Pasero M, Biagioni C, et al. A milk and ochre paint mixture used 49,000 years ago at Sibudu, South Africa. *PLoS One* 2015; 10: (6) e131273. <https://doi.org/10.1371/journal.pone.0131273> PMID: 26125562
28. Tribolo C, Mercier N, Douville E, Joron JL, Reyss JL, Rufer D, et al. 2013. OSL and TL dating of the Middle Stone Age sequence at Diepkloof Rock Shelter (South Africa): a clarification. *J Archaeol Sci*. 2013; 40:3401–3411. <https://doi.org/10.1016/j.jas.2012.12.001>
29. Jacobs Z., Roberts RG. Single-grain OSL chronologies for the Still Bay and Howieson's Poort industries and the transition between them: Further analyses and statistical modelling. *J Hum Evol*. 2017; 107: 1–13. <https://doi.org/10.1016/j.jhevol.2017.02.004> PMID: 28526285
30. Charrié-Duhaut A, Porraz G, Cartwright CR, Igreja M, Connan J, Poggenpoel C, Texier PJ. First molecular identification of a hafting adhesive in the Late Howiesons Poort at Diepkloof Rock Shelter (Western Cape, South Africa). *J Archaeol Sci*. 2013; 40: 3506–3518. <https://doi.org/10.1016/j.jas.2012.12.026>

31. Villa P, Soriano S, Tsanova T, Degano I, Higham TFG, D'Errico F, et al. Border Cave and the beginning of the Later Stone Age in South Africa. *Proc Natl Acad Sci USA* 2012; 109. <https://doi.org/10.1073/pnas.1202629109> PMID: 22847432
32. Mazza PPA, Martini F, Sala B, Magi M, Colombini MP, Giachi G, et al. A new Palaeolithic discovery: tar-hafted stone tools in a European Mid-Pleistocene bone-bearing bed. *J Archaeol Sci*. 2006; 33: 1310–1318. [internal-pdf://611\\_mazza\\_2006-1887956736/611\\_Mazza\\_2006.pdf](https://doi.org/10.1016/j.jas.2006.06.011).
33. Modugno F, Ribechini E, Colombini MP. Chemical study of triterpenoid resinous materials in archaeological findings by means of direct exposure electron ionisation mass spectrometry and gas chromatography/mass spectrometry. *Rapid Commun Mass Spectrom*. 2006; 20: 1787–1800. [internal-pdf://389\\_modugno\\_2006-3263705600/389\\_Modugno\\_2006.pdf](https://doi.org/10.1002/rcm.2507). <https://doi.org/10.1002/rcm.2507> PMID: 16676320
34. Dutton A, Bard E, Antonioli F, Esat TM, Lambeck K, McCulloch MT. Phasing and amplitude of sea-level and climate change during the penultimate interglacial. *Nature Geoscience* 2009; 2(5): 355–359. <https://doi.org/10.1038/ngeo470>
35. Grünberg JM. Middle Palaeolithic birch-bark pitch. *Antiquity* 2002; 76: 15–16. <https://doi.org/10.1017/S0003598X00089638>
36. Koller J, Baumer U, Mania D. High-Tech in the Middle Palaeolithic: Neandertal-Manufactured Pitch Identified. *Eur J Archaeol*. 2001; 4: 385–397. <https://doi.org/10.1177/146195710100400315>
37. Pawlik AF, Thissen JP. Hafted armatures and multi-component tool design at the Micoquian site of Inden-Altdorf, Germany. *J Archaeol Sci*. 2011; 38: 1699–1708. <https://doi.org/10.1016/j.jas.2011.03.001>
38. Boëda E, Connan J, Dessort D, Muhesen S, Mercier N, Valladas H, Tisnérat H. Bitumen as a hafting material on Middle Palaeolithic artefacts. *Nature* 1996; 380: 336. <https://doi.org/10.1038/380336a0>
39. Boëda E, Bonilauri S, Connan J, Jarvie D, Mercier N, Tobey M, et al. New Evidence for Significant Use of Bitumen in Middle Palaeolithic Technical Systems at Umm el Tlel (Syria) around 70,000 BP. *Paleorient* 2008; 34: 67–83. <http://www.jstor.org/stable/41496524>
40. Hauck TC, Connan J, Charrié-Duhaut A, Le Tensorer JM, al Sakhel H. Molecular evidence of bitumen in the Mousterian lithic assemblage of Hummal (Central Syria). *J Archaeol Sci*. 2013; 40: 3252–3262. <https://doi.org/10.1016/j.jas.2013.03.022>
41. Monnier GF, Hauck TC, Feinberg JM, Luo B, Le Tensorer JM, al Sakhel H. A multi-analytical methodology of lithic residue analysis applied to Palaeolithic tools from Hummal, Syria. *J Archaeol Sci*. 40 (2013) 3722–3739. <https://doi.org/10.1016/j.jas.2013.03.018>
42. Cârciumaru M., Ion R.-M., Nițu E.-C., Ștefănescu R., New evidence of adhesive as hafting material on Middle and Upper Palaeolithic artefacts from Gura Cheii-Râșnov Cave (Romania), *J. Archaeol Sci*. 2012; 39: 1942–1950. <https://doi.org/10.1016/j.jas.2012.02.016>
43. Hayes E, Rots V. Documenting scarce and fragmented residues on stone tools: an experimental approach using optical microscopy and SEM-EDS. *Archaeol Anthropol Sci*. 2018. <https://doi.org/10.1007/s12520-018-0736-1>
44. Evans AA. On the importance of blind testing in archaeological science: the example from lithic functional studies. *J Archaeol Sci* 2014; 48: 5–14. <https://doi.org/10.1016/j.jas.2013.10.026>
45. Monnier GF, Ladwig JL, Porter ST. Swept under the rug: the problem of unacknowledged ambiguity in lithic residue. *J Archaeol Sci* 2012; 39: 3284–3300. <https://doi.org/10.1016/j.jas.2012.05.010>
46. Langejans GHJ. Remains of the day-preservation of organic micro-residues on stone tools. *J Archaeol Sci* 2010; 37: 971–985.
47. Rots V, Hayes E, Cruets D, Lepers C, Fullagar R. Making Sense of Residues on Flaked Stone Artefacts: Learning from Blind Tests. *PLoS ONE* 2016; 11(3): e0150437. <https://doi.org/10.1371/journal.pone.0150437> PMID: 26930210
48. Alhaïque F, Lemorini C. Butchering with stone tools: an experimental approach to use wear analysis and taphonomic studies of the archeological material from Grotta Breuil (Monte Circeo). *Quaternaria Nova* 1996; 6: 393–412.
49. Blanc AC, Segre AG. Excursion au Mont Circé. In: 4th Conf Int Assoc Quatern Res. Rome-Pisa 1953. pp. 87–106.
50. Vitagliano S. Il Musteriano evoluto e finale (F27-F23) della Grotta del Fossellone (San Felice Circeo, Latina). In: Strategie di insediamento fra Lazio e Campania in età preistorica e protostorica. Atti della XL Riunione Scientifica dell'Istituto Ital. Preistoria e Protostoria, 2007: pp. 307–317]
51. Vitagliano S, Piperno M. Lithic industry of level 27 Beta of the Fossellone cave (S. Felice Circeo, Latina), *Quaternaria Nova* 1991; 1: 289–304.

52. Vitagliano S, Bruno M. Late and final mousterian setting in the Fossellone Cave (Latium, Italy): Patterns of settlement, micro-environmental factors and evidence of coloured material in a transitional context, *Quat Int.* 2012; 259: 48–58. <https://doi.org/10.1016/j.quaint.2011.03.038>
53. Laplace G. Recherches sur l'origine et l'évolution des complexes leptolithiques. École Française de Rome; 1966.
54. Mallegni F, Segre-Naldini E. A human maxilla (Fossellone 1) and scapula (Fossellone 2) recovered in the Pleistocene layers of the Fossellone cave, Mt. Circeo, Italy. *Quaternaria Nova* 1992; 2: 211–225.
55. Mallegni F, Segre-Naldini E. Une pièce humaine de l'Aurignacien ancien trouvée dans la grotte du Fossellone (Mont Circeo, Latium, Italie). *Archivio per l'antropologia e la Etnologia* 1993; 123: 415–423.
56. Mercier N, Falguères C. Field gamma dose-rate measurement with a NaI(Tl) detector: re-evaluation of the “threshold” technique. *Ancient TL* 2007; 25: 1–4.
57. Rhodes EJ, Schwenninger JL. Dose rates and radioisotope concentrations in the concrete calibration blocks at Oxford. *Ancient TL.* 25 (2007) 5–8.
58. Bøtter-Jensen L, Mejdahl V. Assessment of beta dose-rate using a GM multicounter system. *Int J Rad Appl Instrum D* 1988; 14 (1):187–191. [https://doi.org/10.1016/1359-0189\(88\)90062-3](https://doi.org/10.1016/1359-0189(88)90062-3)
59. Prescott JR, Hutton JT. Cosmic ray contributions to dose rates for luminescence and ESR dating: Large depths and long-term time variations. *Radiat Meas.* 1994; 23: 497–500. [https://doi.org/10.1016/1350-4487\(94\)90086-8](https://doi.org/10.1016/1350-4487(94)90086-8)
60. Huntley DJ, Baril MR. The K content of the K-feldspars being measured in optical dating or in thermoluminescence dating. *Ancient TL.* 1997; 15: 11–13.
61. Huntley DJ, Hancock RGV. The Rb contents of the K-feldspar grains being measured in optical dating. *Ancient TL.* 2001; 19: 43–46.
62. Guérin G, Mercier N, Adamiec G. Dose-rate conversion factors: update. *Ancient TL.* 2011; 29(1):5–8.
63. Li B, Li SH. Luminescence dating of K-feldspar from sediments: a protocol without anomalous fading correction. *Quat Geochronol.* 2011; 6: 468–479. <https://doi.org/10.1016/j.quageo.2011.05.001>
64. Reimer PJ, Bard E, Bayliss A, Beck JW, Blackwell PG, Ramsey CB, et al. 2013. IntCal13 and Marine13 radiocarbon age calibration curves 0–50,000 years cal BP. *Radiocarbon* 2013; 55(4): 1869–1887.
65. Le Brun-Ricalens F. Reconnaissance d'un “concept technoculturel” de l'Aurignacien ancien? Modalités, unités et variabilités des productions lamellaires du site d'Hui (Beauville, Lot-et-Garonne, France): significations et implication. *Productions lamellaires attribuées à l'Aurignacien, chaînes opératoires et perspectives techno-culturelles.* 2005:157–90.
66. Laplace G. Recherches sur l'origine et l'évolution des complexes leptolithiques. École Française de Rome 1966. [https://www.persee.fr/doc/efr\\_0000-0000\\_1966\\_mon\\_4\\_1\\_4922](https://www.persee.fr/doc/efr_0000-0000_1966_mon_4_1_4922)
67. Chiotti L, Cretin C. Les mises en forme de grattoirs carénés / nucléus de l'aurignacien ancien de l'abri Castanet (Sergeac, Dordogne). *Paleo* 2011; 69–84.
68. Soriano S, Robert A, Huysecom E. Percussion bipolaire sur enclume: choix ou contrainte? L'exemple du paléolithique d'Ounjougou (Pays dogon, Mali). *Paleo* 2010: 123–132.
69. Bon F. L'Aurignacien entre mer et océan. Réflexion sur l'unité des phases anciennes de l'Aurignacien dans le sud de la France. Paris: Société Préhistorique Française, Mémoire XXIX; 2002.
70. Chiotti L. Lamelles Dufour et grattoirs aurignaciens (carénés et à museau) de la couche 8 de l'abri Pataud, Les Eyzies-de-Tayac, Dordogne. *L' Anthropologie* 2000; 104: 239–263. [https://doi.org/10.1016/S0003-5521\(00\)80046-1](https://doi.org/10.1016/S0003-5521(00)80046-1)
71. Chiotti L. Les productions lamellaires dans l'Aurignacien de l'abri Pataud, Les Eyzies-de-Tayac (Dordogne). *Gallia Préhistoire* 2003; 45: 113–156. <https://doi.org/10.3406/galip.2003.2037>
72. Teyssandier N. En route vers l'Ouest: les débuts de l'Aurignacien en Europe. John and Erica Hedges Ltd.; 2007.
73. Barshay-Szmidt C, Normand C, Flas D, Soulier MC. Radiocarbon dating the Aurignacian sequence at Isturitz (France): Implications for the timing and development of the Protoaurignacian and Early Aurignacian in western Europe. *J Archaeol Sci Reports* 2018; 17: 809–838. <https://doi.org/https://doi.org/10.1016/j.jasrep.2017.09.003>
74. Higham T, Ramsey C, Basell L, Brock F, Wood R, Davies W. Radiocarbon dating & Bayesian modelling from the Grotte du Renne & a Neanderthal origin for the Châtelperronian. *Before Farming* 2012; 3: 1–6.
75. Higham T, Brock F, Peresani M, Broglio A, Wood R, Douka K. Problems with radiocarbon dating the Middle to Upper Palaeolithic transition in Italy. *Quat Sci Rev.* 2009; 28: 1257–1267. doi:<https://doi.org/10.1016/j.quascirev.2008.12.018>

76. Higham T, Jacobi R, Basell L, Ramsey CB, Chiotti L, Nespoulet R. Precision dating of the Palaeolithic: A new radiocarbon chronology for the Abri Pataud (France), a key Aurignacian sequence, *J Hum Evol.* 2011; 61: 549–563. <https://doi.org/10.1016/j.jhevol.2011.06.005> PMID: 21868058
77. Higham T, Jacobi R, Julien M, David F, Basell L, Wood R, et al. Chronology of the Grotte du Renne (France) and implications for the context of ornaments and human remains within the Châtelperronian, *Proc. Natl. Acad. Sci.* 2010; 107: 20234–20239. <http://www.pnas.org/content/107/47/20234> PMID: 20956292
78. Szmidski CC, Normand C, Burr GS, Hodgins GWL, LaMotta S. AMS 14C dating the Protoaurignacian/Early Aurignacian of Isturitz, France. Implications for Neanderthal-modern human interaction and the timing of technical and cultural innovations in Europe, *J Archaeol Sci.* 2010; 37: 758–768. <https://doi.org/10.1016/j.jas.2009.11.006>
79. Talamo S, Soressi M, Rousset M, Richards M, Hublin JJ. A radiocarbon chronology for the complete Middle to Upper Palaeolithic transitional sequence of Les Cottés (France). *J Archaeol Sci.* 2012; 39: 175–183. <https://doi.org/10.1016/j.jas.2011.09.019>
80. White R, Mensan R, Bourrillon R, Cretin C, Higham TFG, Clark AE, et al. Context and dating of Aurignacian vulvar representations from Abri Castanet, France. *Proc. Natl. Acad. Sci. USA* 2012; 109: 8450–8455. <https://doi.org/10.1073/pnas.1119663109> PMID: 22586111
81. Banks WE, d'Errico F, Zilhão J. Revisiting the chronology of the Proto-Aurignacian and the Early Aurignacian in Europe: A reply to Higham et al.'s comments on Banks et al. (2013). *J Hum Evol.* 2013; 65: 810–817. <https://doi.org/10.1016/j.jhevol.2013.08.004> PMID: 24095637
82. Banks WE, d'Errico F, Zilhão J. Human-climate interaction during the Early Upper Paleolithic: Testing the hypothesis of an adaptive shift between the Proto-Aurignacian and the Early Aurignacian. *J Hum Evol.* 2013; 64: 39–55. <https://doi.org/10.1016/j.jhevol.2012.10.001> PMID: 23245623
83. Palma di Cesnola A. *Le Paléolithique supérieur en Italie.* Grenoble: Éditions Jérôme Millon; 2001.
84. Blanc A. Nuovo giacimento Paleolitico e Mesolitico ai Balzi Rossi di Grimaldi. *Rendiconti dell'Accademia Nazionale dei Lincei* 1938; 28: 107–113.
85. Douka K, Grimaldi S, Boschian G, del Lucchese A, Higham TFG. A new chronostratigraphic framework for the Upper Palaeolithic of Riparo Mochi (Italy). *J Hum Evol.* 2012; 62: 286–299. <https://doi.org/10.1016/j.jhevol.2011.11.009> PMID: 22189428
86. Tejero S, Grimaldi S. Assessing bone and antler exploitation at Riparo Mochi (Balzi Rossi, Italy): Implications for the characterization of the Aurignacian in South-western Europe. *J Archaeol Sci.* 2015; 61: 59–77. <https://doi.org/10.1016/j.jas.2015.05.003>
87. Villa P, Soriano S, Grün R, Marra F, Nomade S, Pereira A, et al. 2016. The Acheulian and Early Middle Paleolithic in Latium (Italy): Stability and innovation. *PLoS One* 2016; 11: e0160516. <https://doi.org/10.1371/journal.pone.0160516> PMID: 27525705
88. Soriano S, Villa P. Early Levallois and the beginning of the Middle Paleolithic in central Italy. *PLoS One* 2017; 12: e0186082. <https://doi.org/10.1371/journal.pone.0186082> PMID: 29053710
89. Villa P, Pollarolo L, Conforti J, Marra F, Biagioni C, Degano I, et al. (2018) From Neandertals to modern humans: New data on the Uluzzian. *PLoS ONE* 2018; 13(5): e0196786. <https://doi.org/10.1371/journal.pone.0196786> PMID: 29742147
90. Kuhn SL. *Mousterian Lithic Technology. An Ecological Perspective.* Princeton: Princeton University Press; 1995.
91. Boëda E. Le débitage discoïde et le débitage Levallois récurrent centripède. *Bulletin Société Préhistorique Française* 1993; 90: 392–404. <https://doi.org/10.3406/bspf.1993.9669>
92. Peresani M, Soressi M. Discoid Lithic Technology: Advances and Implications, *PaleoAnthropology* 2005: 1–5.
93. Porraz G. Les pièces amincies de la Baume des Peyrards (Massif du Luberon, Vaucluse): analyse des procédés de réalisation. *Préhistoires Méditerranéennes* 2002; 10–11; 27–38. <https://journals.openedition.org/pm/242#quotation>
94. Peresani M, Boldrin M, Pasetti P. Assessing the exploitation of double patinated artifacts from the late Mousterian: Implications for lithic economy and human mobility in northern Italy. *Quat Int.* 2015; 361: 238–250. <https://doi.org/10.1016/j.quaint.2014.10.058>
95. Romagnoli F. A second life: Recycling production waste during the Middle Palaeolithic in layer L at Grotta del Cavallo (Lecce, Southeast Italy). *Quat Int.* 2015; 361: 200–211. <https://doi.org/10.1016/j.quaint.2014.07.033>
96. Tozzi C. La Grotta di S. Agostino (Gaeta). *Rivista di Scienze Preistoriche* 1970; 25: 3–87.
97. Schwarcz HP, Buhay M, Grün R, Stiner M, Kuhn S, Miller GH. Absolute dating of sites in coastal Lazio. *Quaternaria Nova* 1991; 1: 51–67.

98. Faivre JP, Geneste JM, Turq A. La fracturation en split, une technique de production dans l'industrie lithique des Tares (Sourzac, Dordogne). In: Mourre V, Jarry M editors. *Entre le marteau et l'enclume. .La percussion directe au percuteur dur et la diversité de ses modalités d'application*. PALEO 2009–2010. pp. 133–142
99. Laj Pannocchia F. L'industria pontiniana della Grotta di S. Agostino (Gaeta). *Rivista di Scienze Preistoriche* 1950; 5, 67–86.
100. Andreotti A, Bonaduce I, Colombini MP, Gautier G, Modugno F, Ribechini E. Combined GC/MS Analytical Procedure for the Characterization of Glycerolipid, Waxy, Resinous, and Proteinaceous Materials in a Unique Paint Microsample. *Anal Chem*. 2006; 78; 4490–4500. internal-pdf://67\_andreotti\_2006-2810567936/67\_Andreotti\_2006.pdf. <https://doi.org/10.1021/ac0519615> PMID: 16808458
101. Lluveras A, Bonaduce I, Andreotti A, Colombini MP. GC/MS analytical procedure for the characterization of glycerolipids, natural waxes, terpenoid resins, proteinaceous and polysaccharide materials in the same paint microsample avoiding interferences from inorganic media. *Anal Chem*. 2010; 82: 376–386. <https://doi.org/10.1021/ac902141m> PMID: 19954203
102. Colombini MP, Modugno F, editors. *Organic mass spectrometry in art and archaeology*. John Wiley & Sons; 2009.
103. Bonaduce I, Colombini MP. Characterisation of beeswax in works of art by gas chromatography-mass spectrometry and pyrolysis-gas chromatography-mass spectrometry procedures. *J Chromatogr A*. 2004; 1028(2): 297–306. <https://doi.org/10.1016/j.chroma.2003.11.086> PMID: 14989483
104. Ribechini E, Modugno F, Colombini MP, Evershed R. Gas chromatographic and mass spectrometric investigations of organic residues from Roman glass unguentaria. *J Chromatogr A* 2008; 1183: 158–169. <https://doi.org/10.1016/j.chroma.2007.12.090> PMID: 18243222
105. Garnier N, Cren-Olive C, Rolando C, Regert M. Characterization of Archaeological Beeswax by Electron Ionization and Electrospray Ionization Mass Spectrometry. *Anal Chem*. 2002; 74: 4868–4877. PMID: 12380806
106. Modugno F, Ribechini E. GC/MS in the Characterisation of Resinous Materials,. In: Colombini MP, Modugno F editors. *Organic Mass Spectrometry in Art and Archaeology*. Wiley&Sons Ltd 2009: pp. 215–235. <https://doi.org/10.1002/9780470741917.ch8>
107. Duce C, Orsini S, Spepi A, Colombini MP, Tiné MR, Ribechini E. Thermal degradation chemistry of archaeological pine pitch containing beeswax as an additive. *J Anal Appl Pyrolysis* 2015; 111: 254–264. <https://doi.org/10.1016/j.jaap.2014.10.020>
108. Baales M, Birker S, Mucha F. Hafting with beeswax in the Final Palaeolithic: a barbed point from Bergkamen. *Antiquity* 2017; 91: 1155–1170.
109. Pollard AM, Heron C. *Archaeological Chemistry*. Cambridge: RSC Publishing; 1996.
110. Colombini MP, Modugno F, Ribechini E. Direct exposure electron ionization mass spectrometry and gas chromatography/mass spectrometry techniques to study organic coatings on archaeological amphorae. *J Mass Spectrom*. 2005; 40: 675–687. <https://doi.org/10.1002/jms.841> PMID: 15739159
111. Schmidt P, Porraz G, Bellot-Gurlet L, February E, Ligouis B, Paris C, et al. A previously undescribed organic residue sheds light on heat treatment in the Middle Stone Age. *J Hum Evol*. 85: 22–34. <http://dx.doi.org/10.1016/j.jhevol.2015.05.001> PMID: 26073074
112. Croft S, Colonese AC, Lucquin A, Craig OE, Conneller C, Milner N. Pine traces at Star Carr: Evidence from residues on stone tool. *J Archaeol Sci Reports* 2018; 21: 21–31. <https://doi.org/10.1016/j.jasrep.2018.06.021>
